# Supplementary material for: A 250 plastome phylogeny of the grass family (Poaceae): topological support under different data partitions
Source: PubMed Central journal article supplement (PMC5798404; doi:10.7717/peerj.4299), 2018-02-02

B

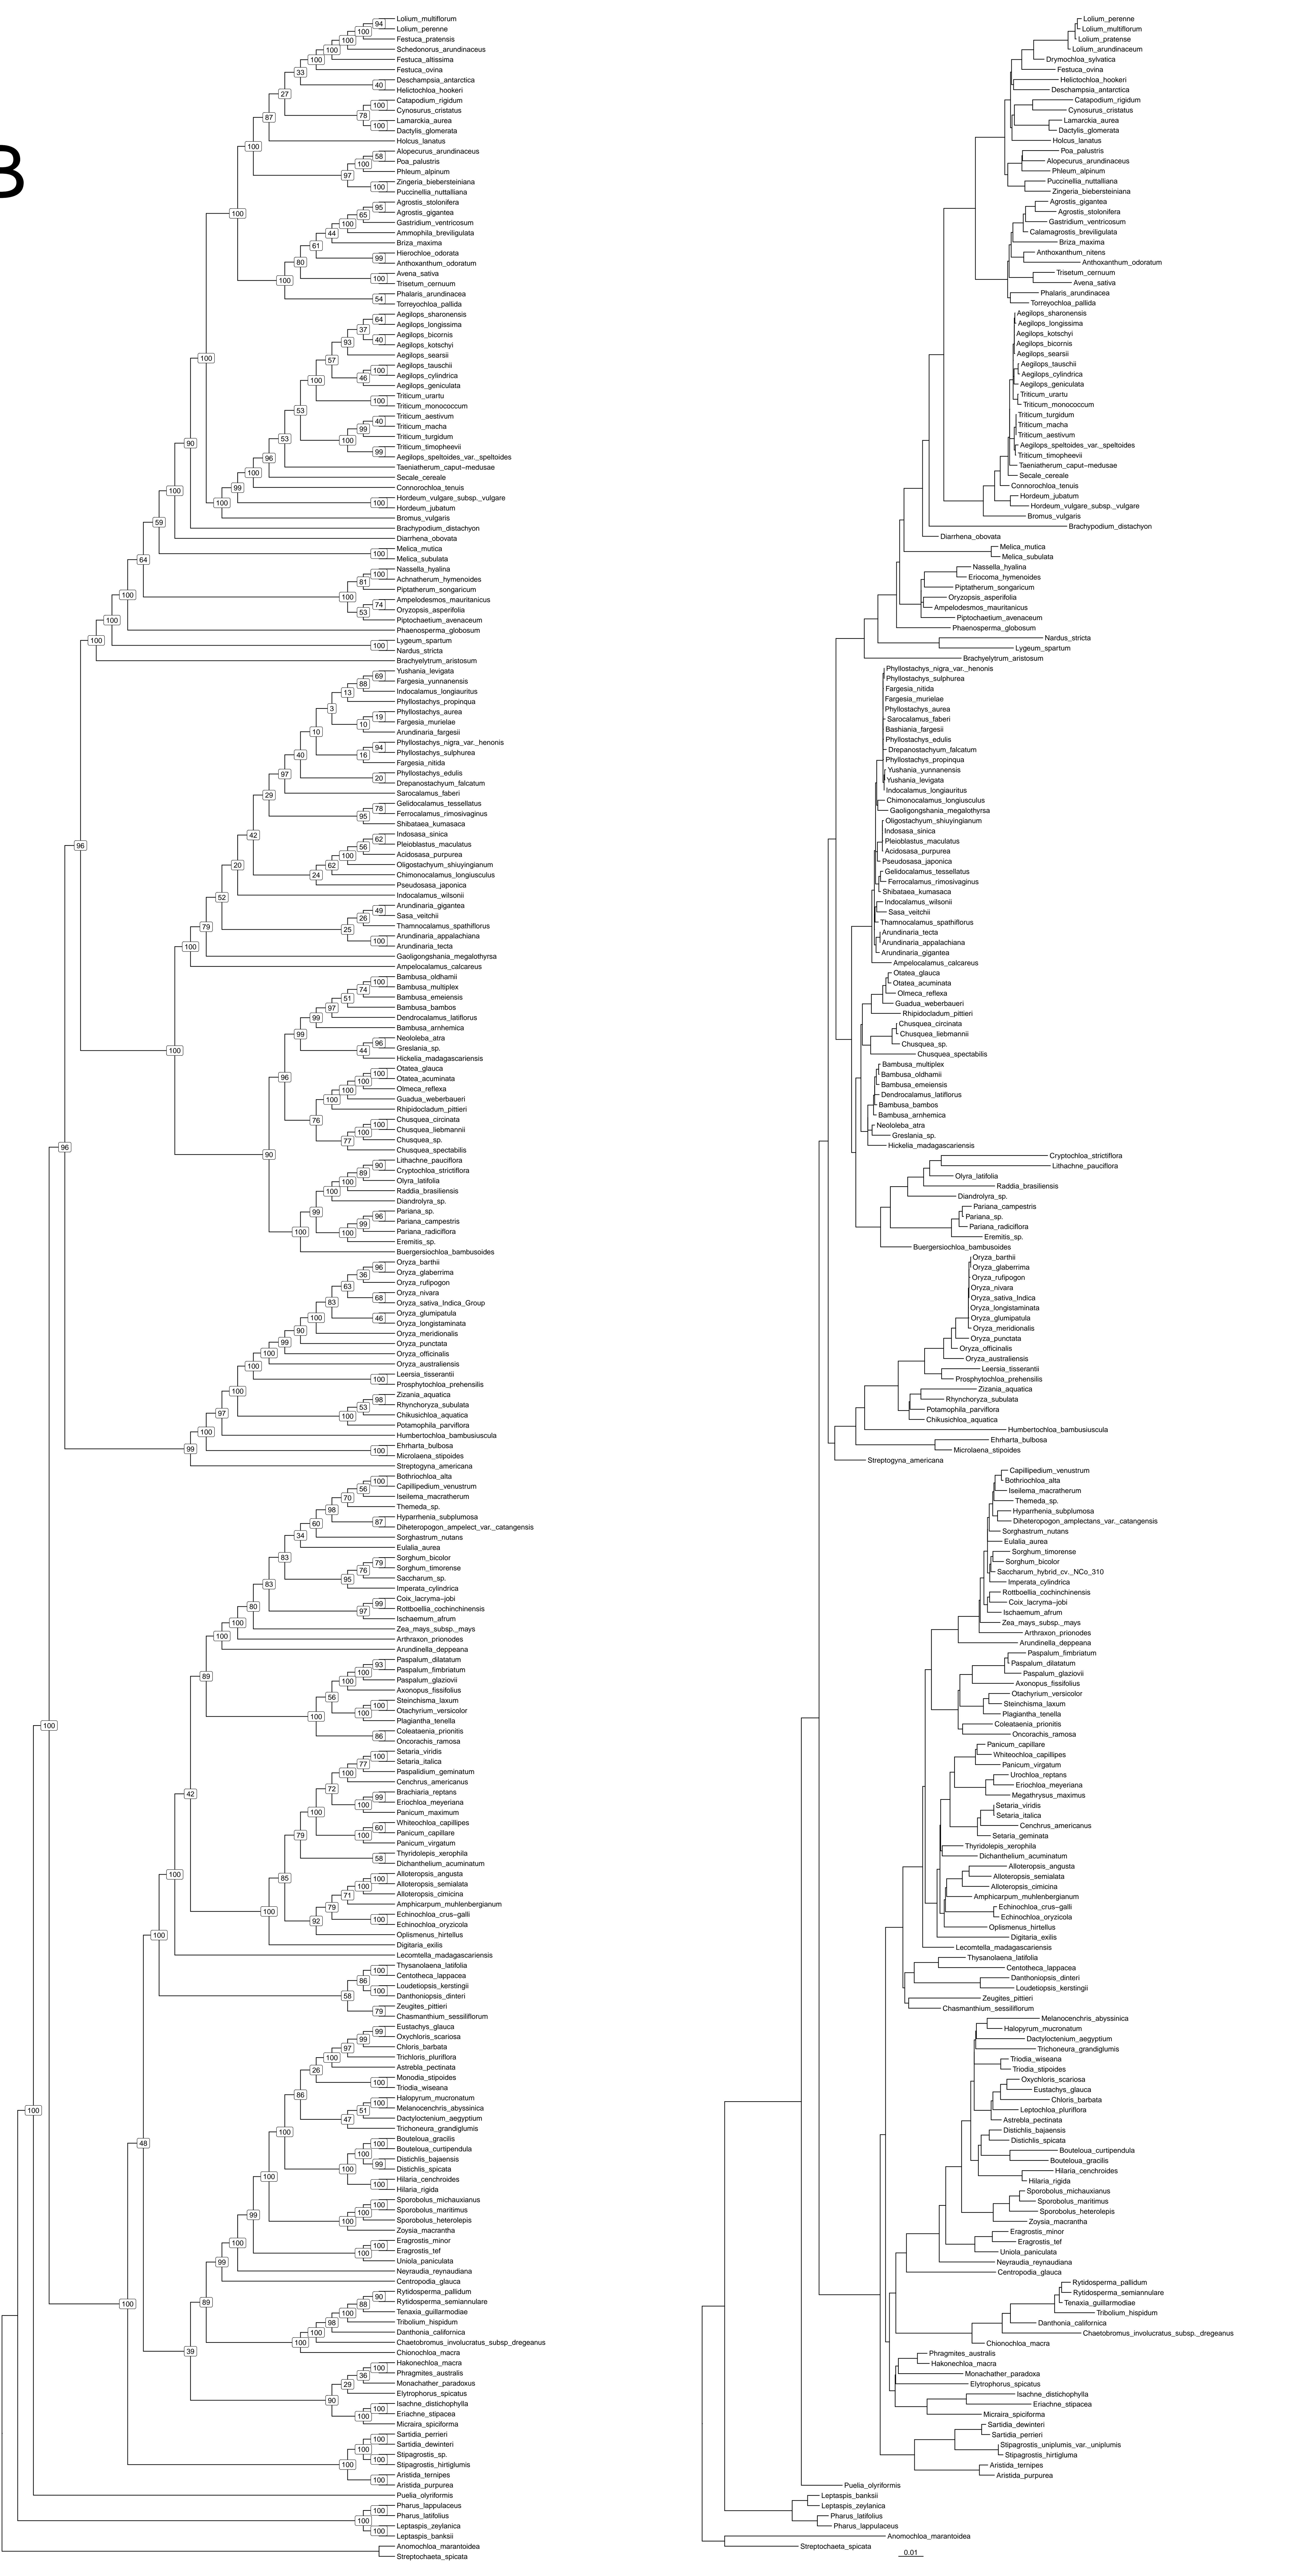

C

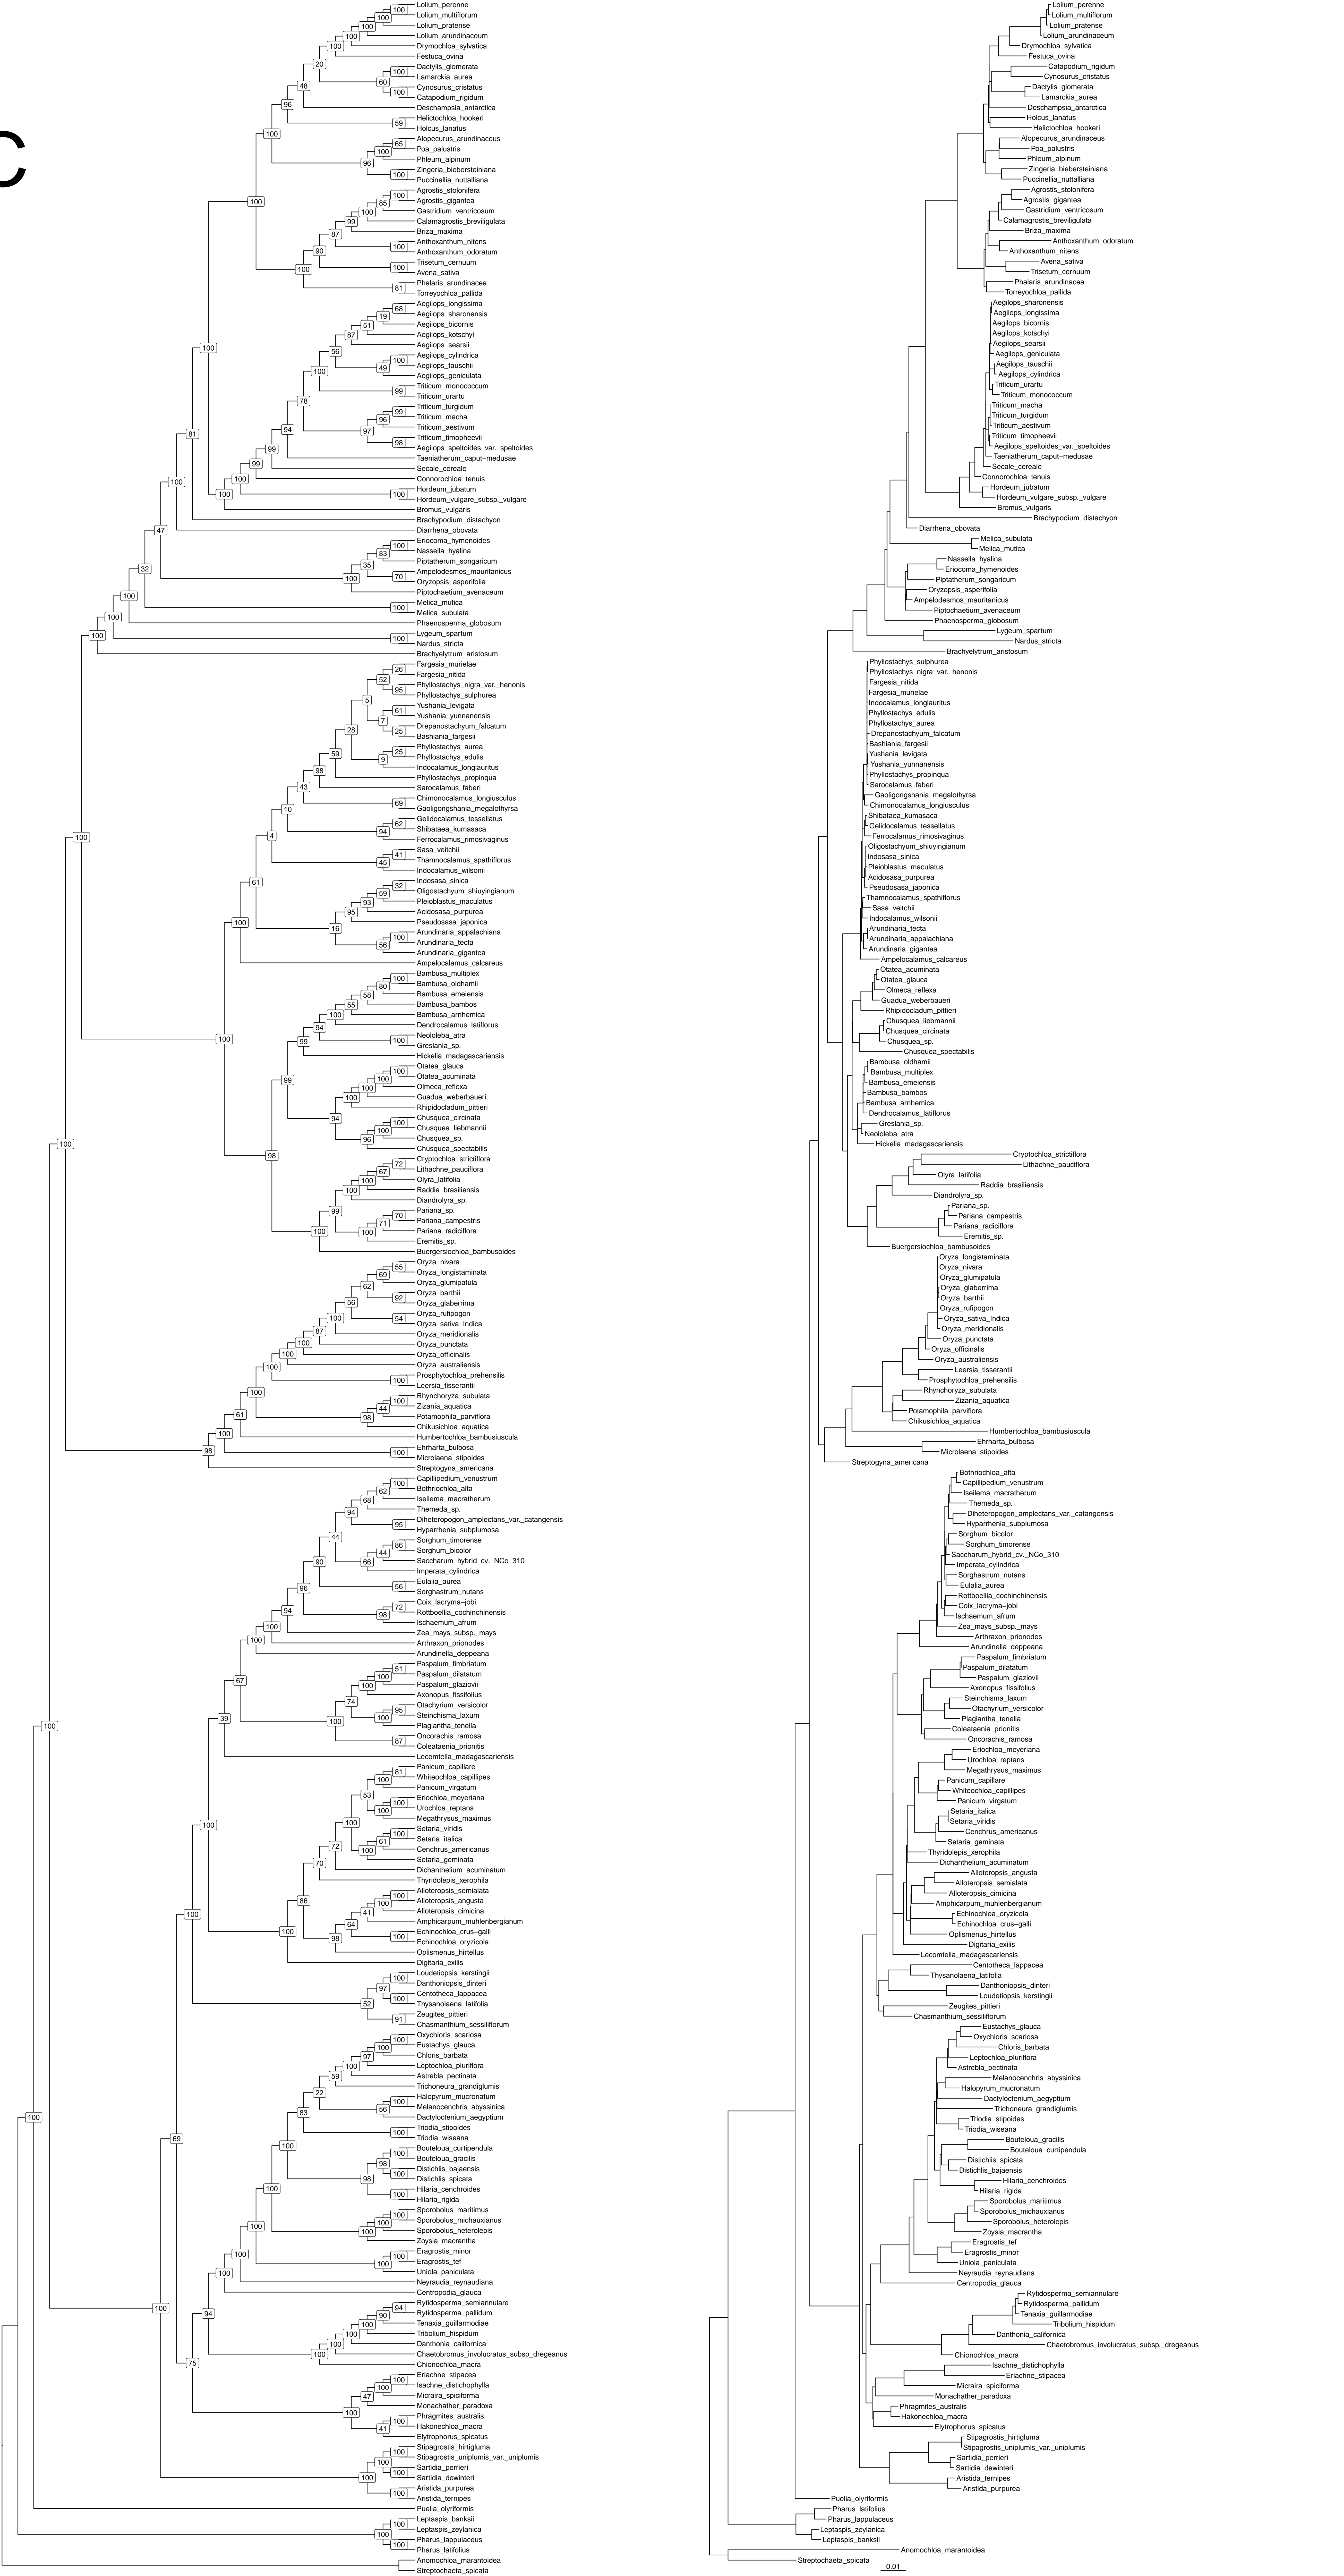

D

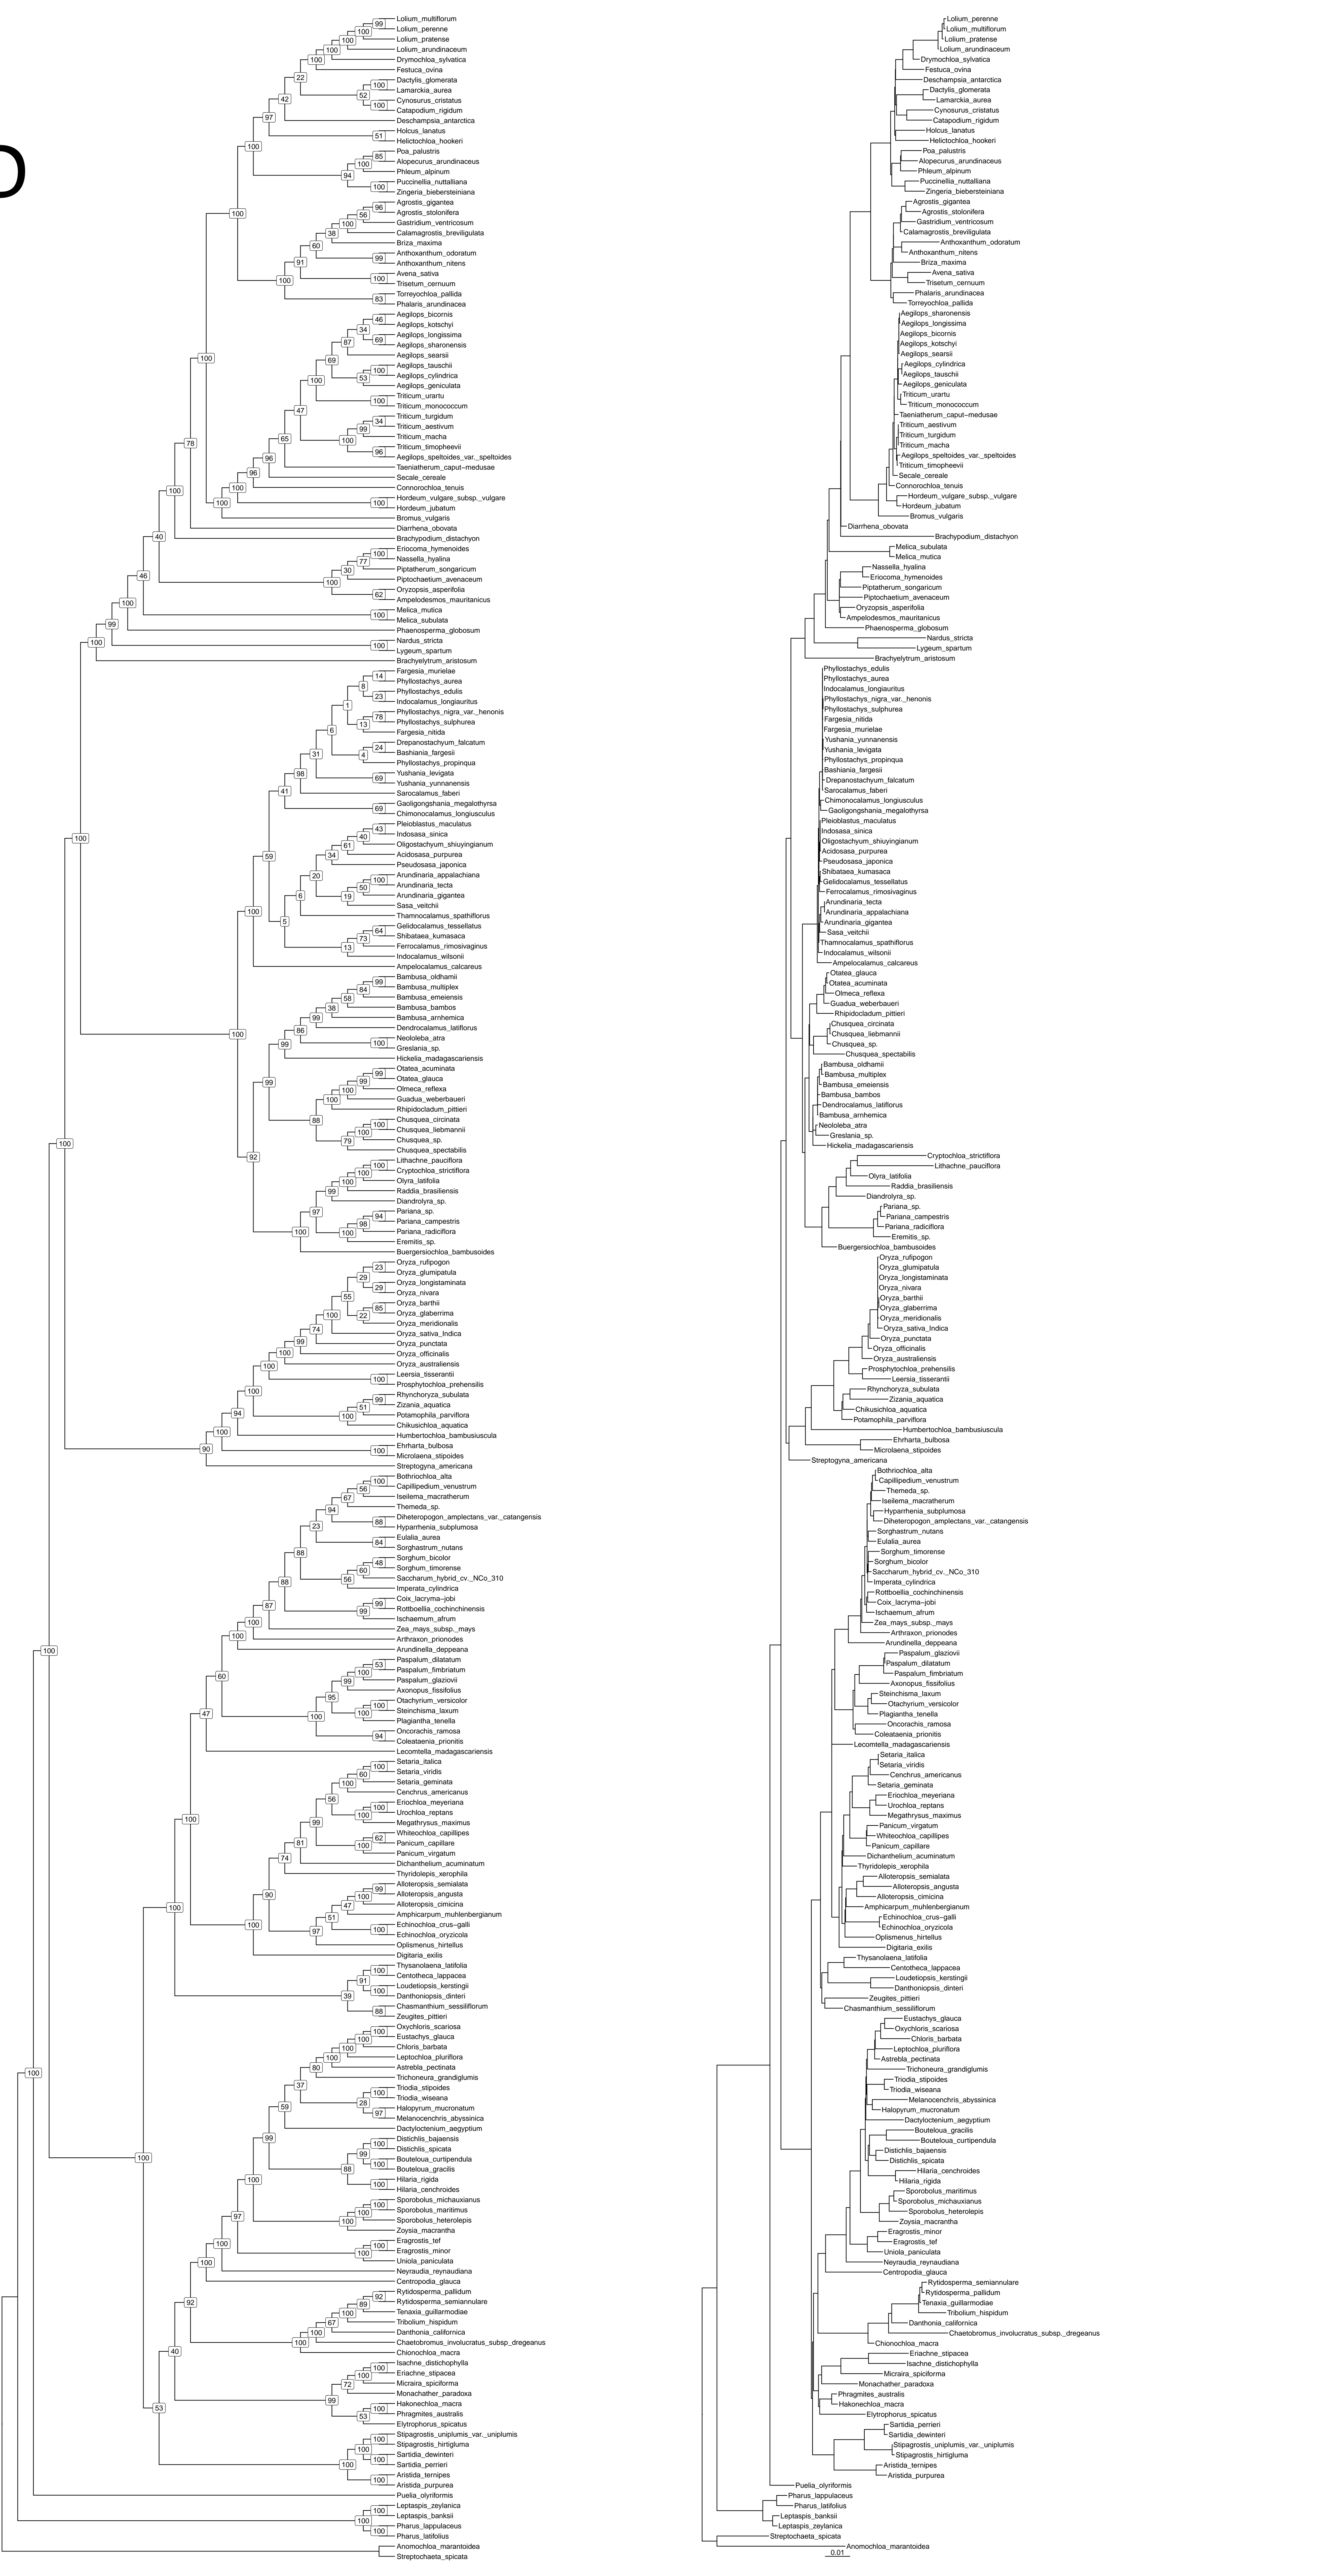

E

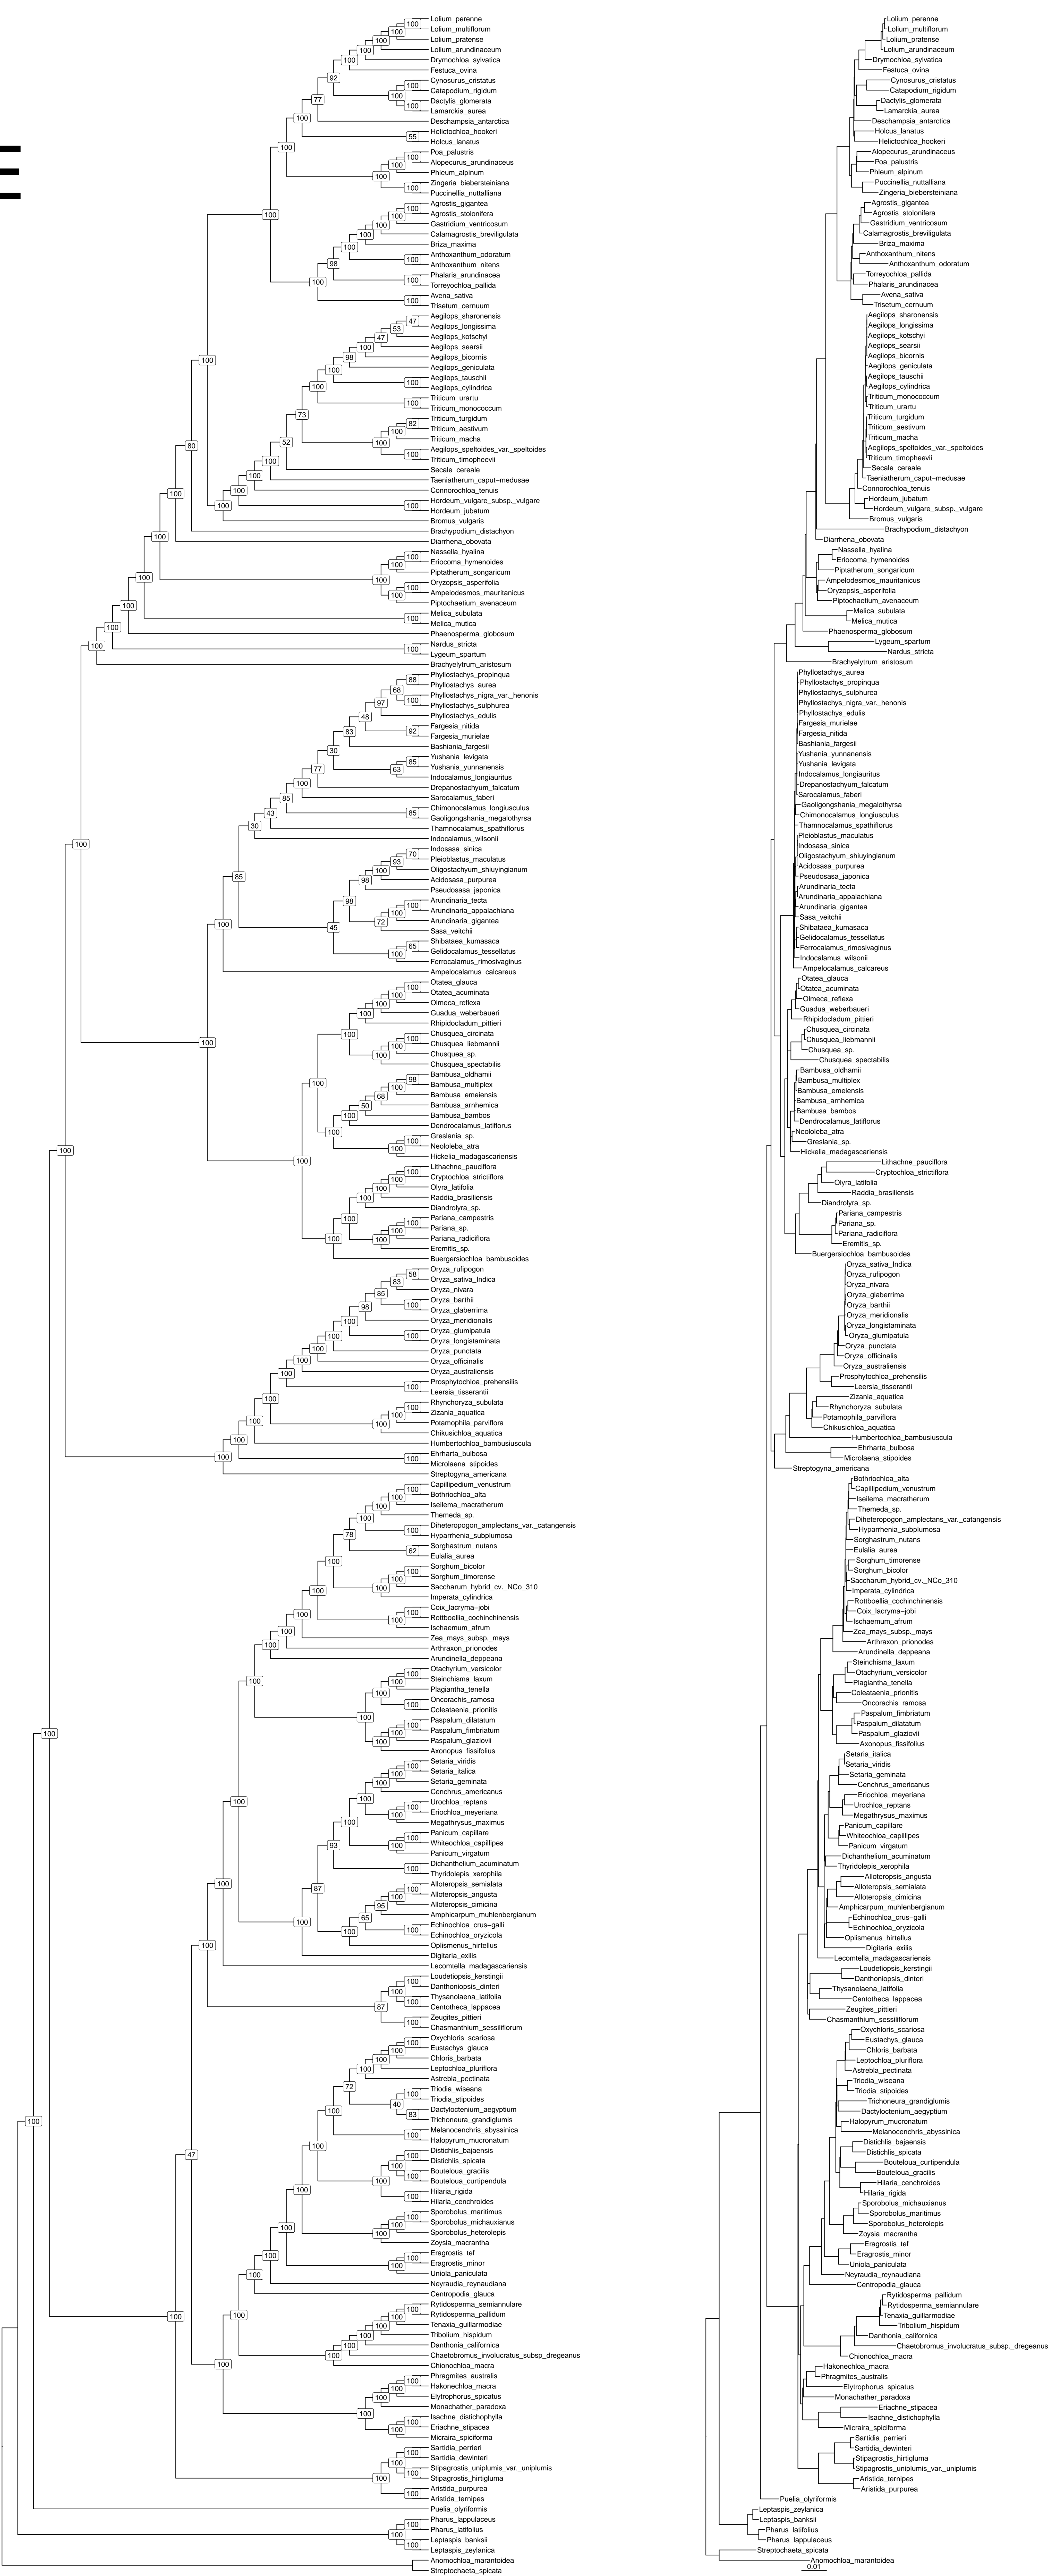



G

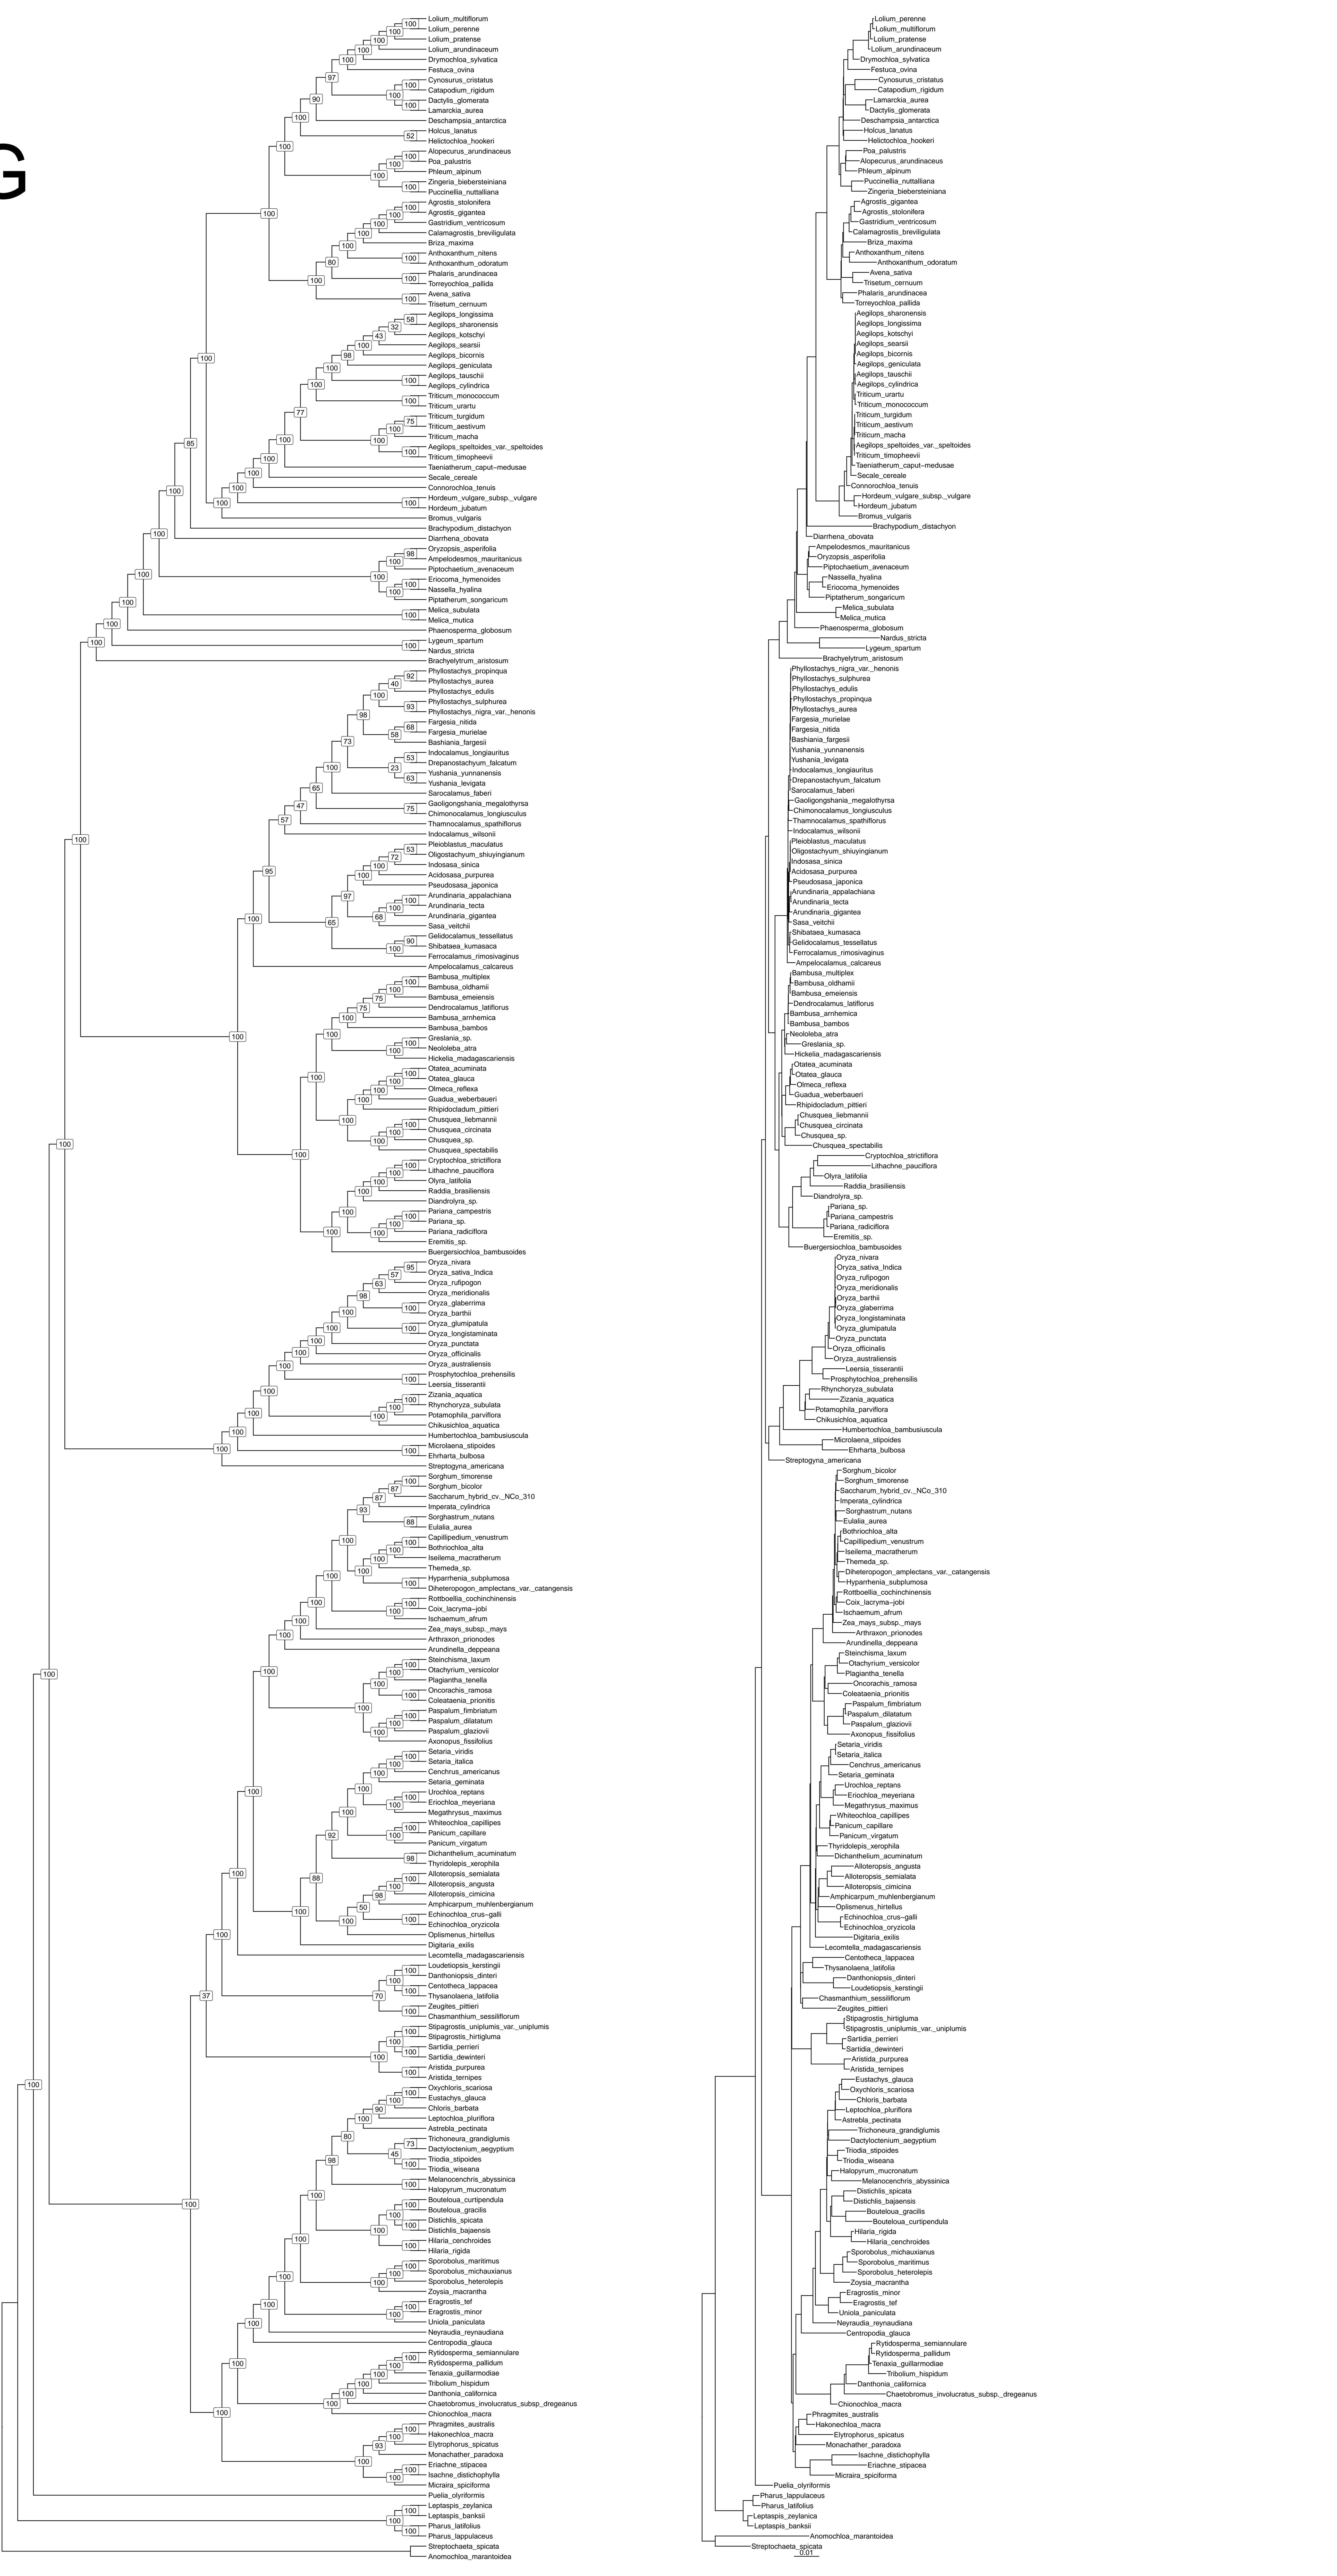

H

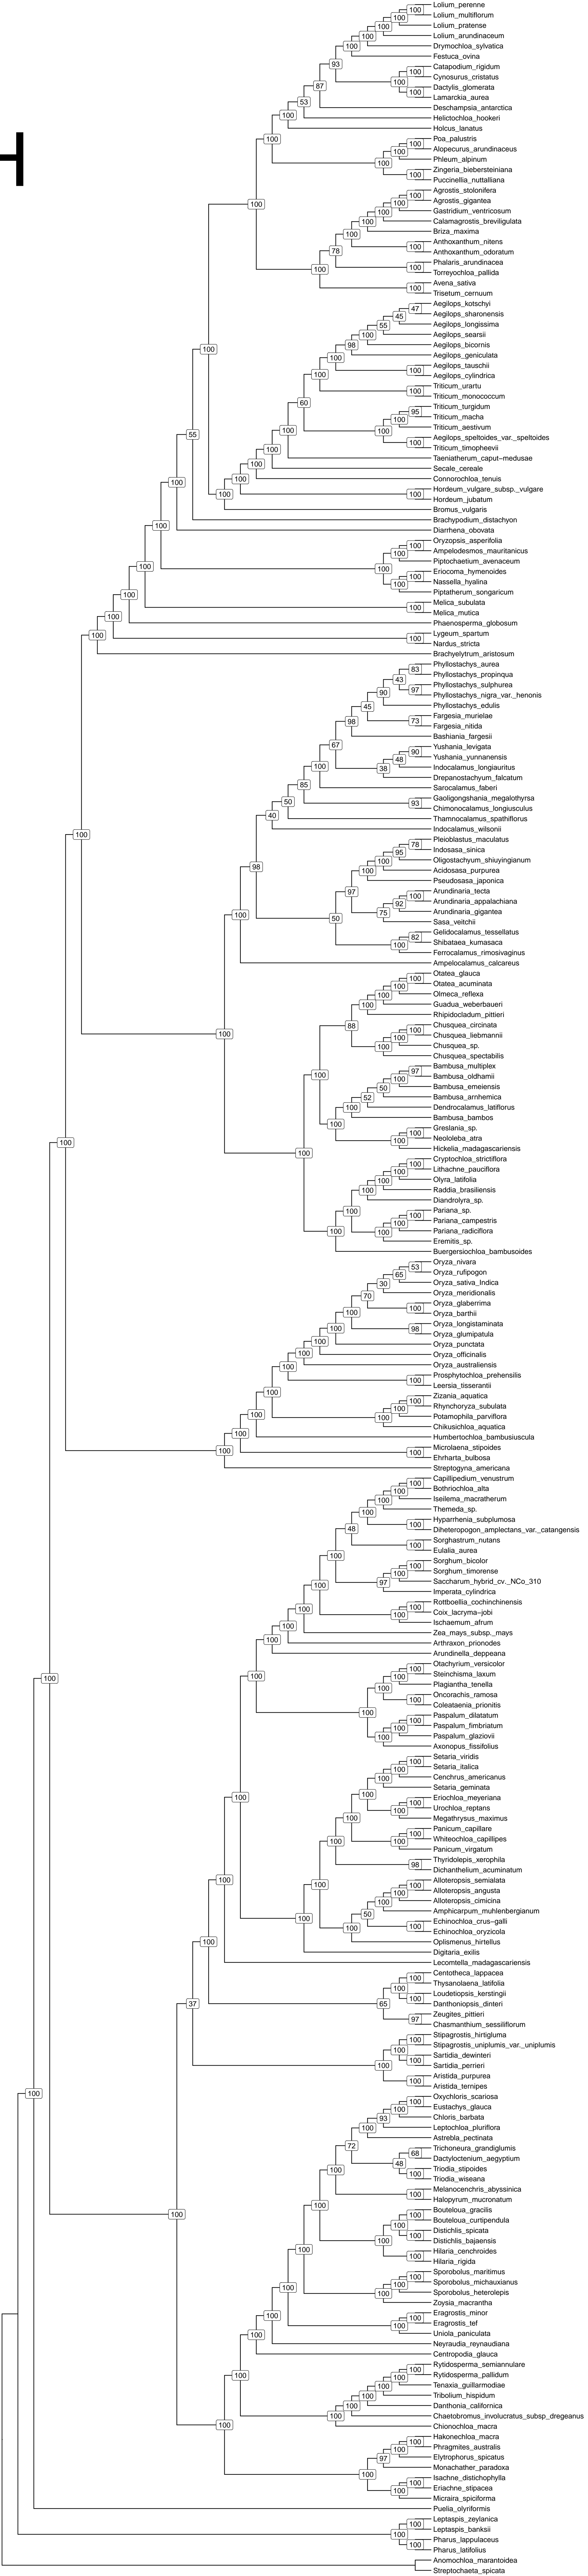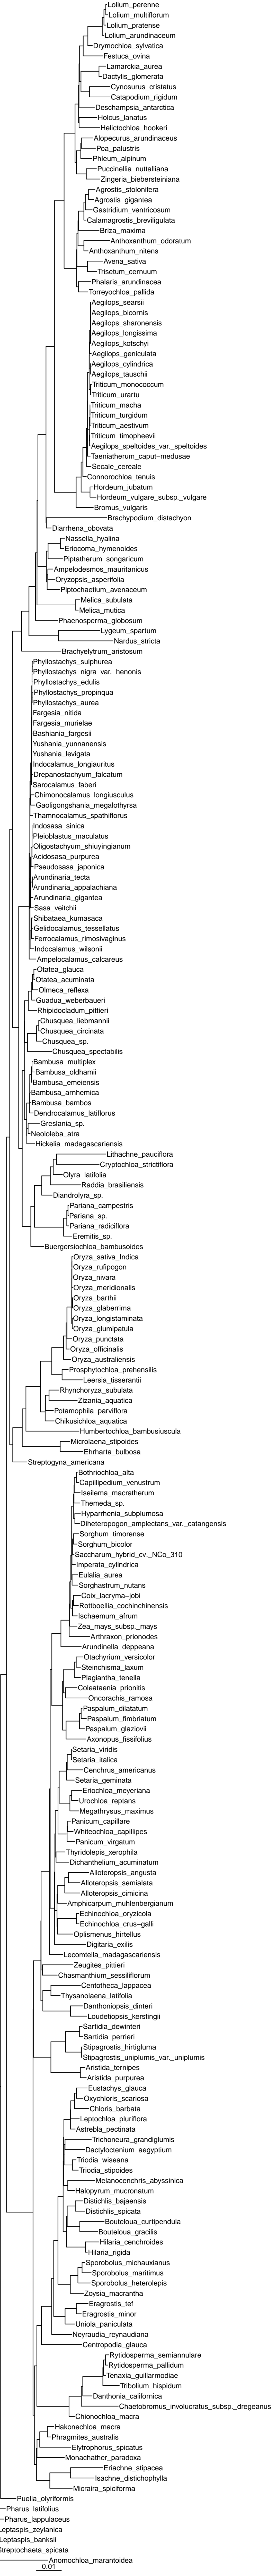



Q

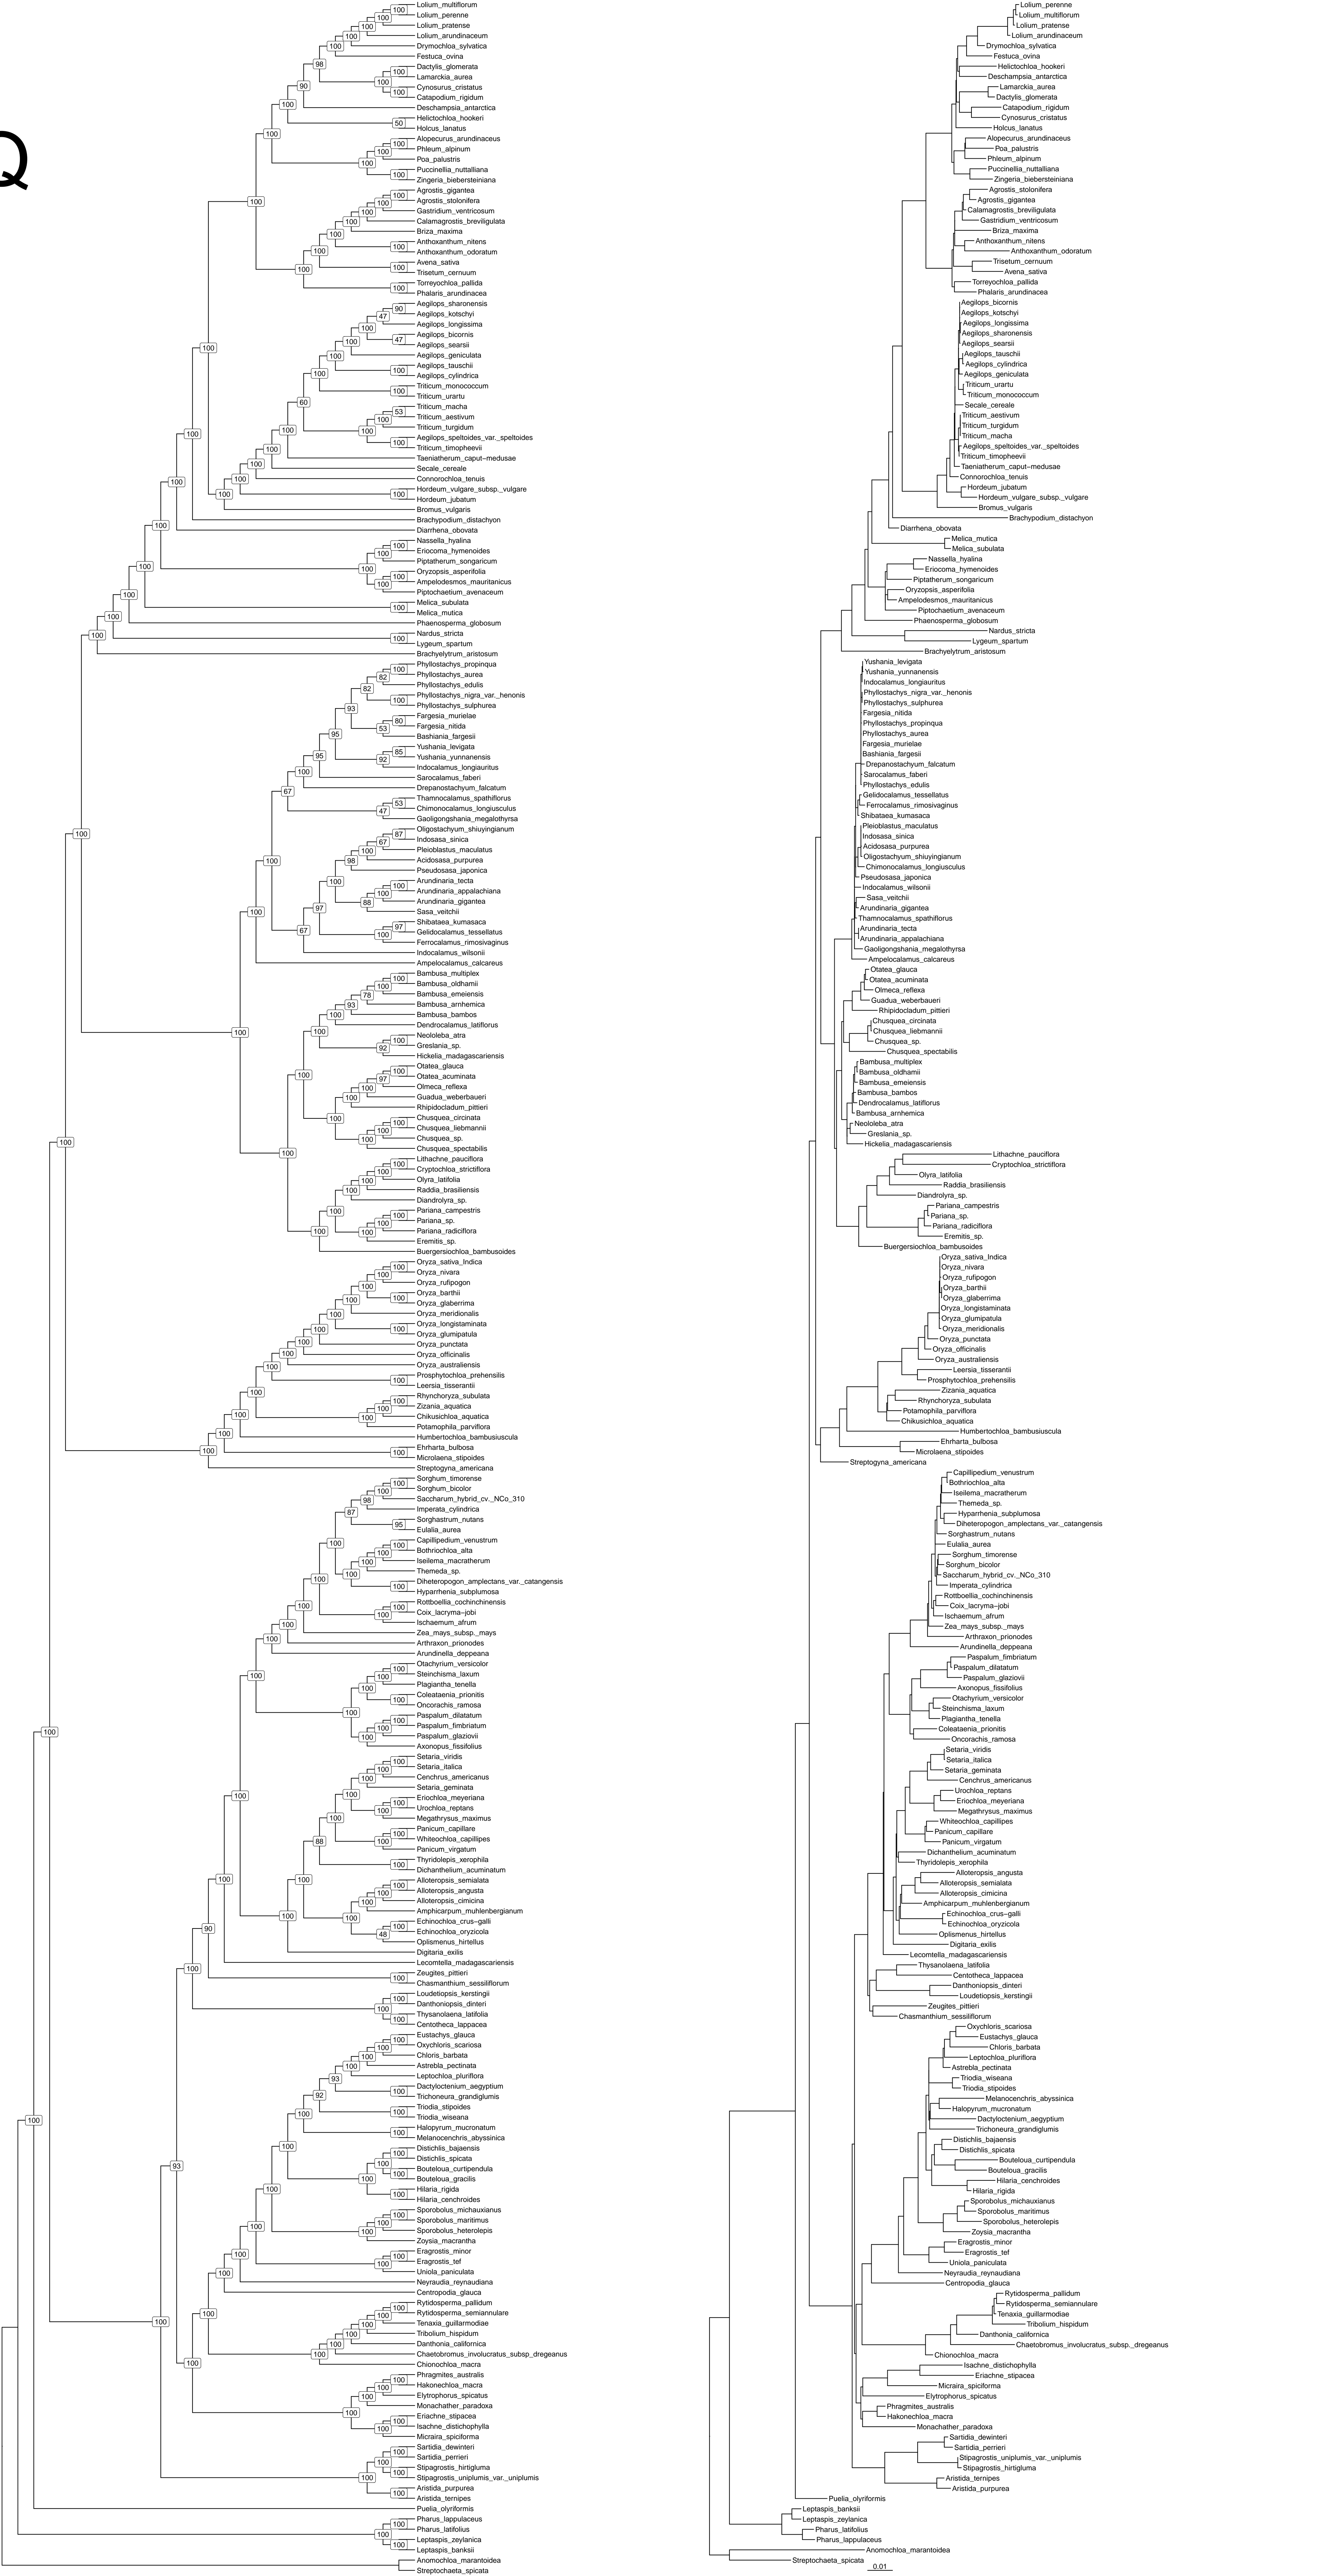



W

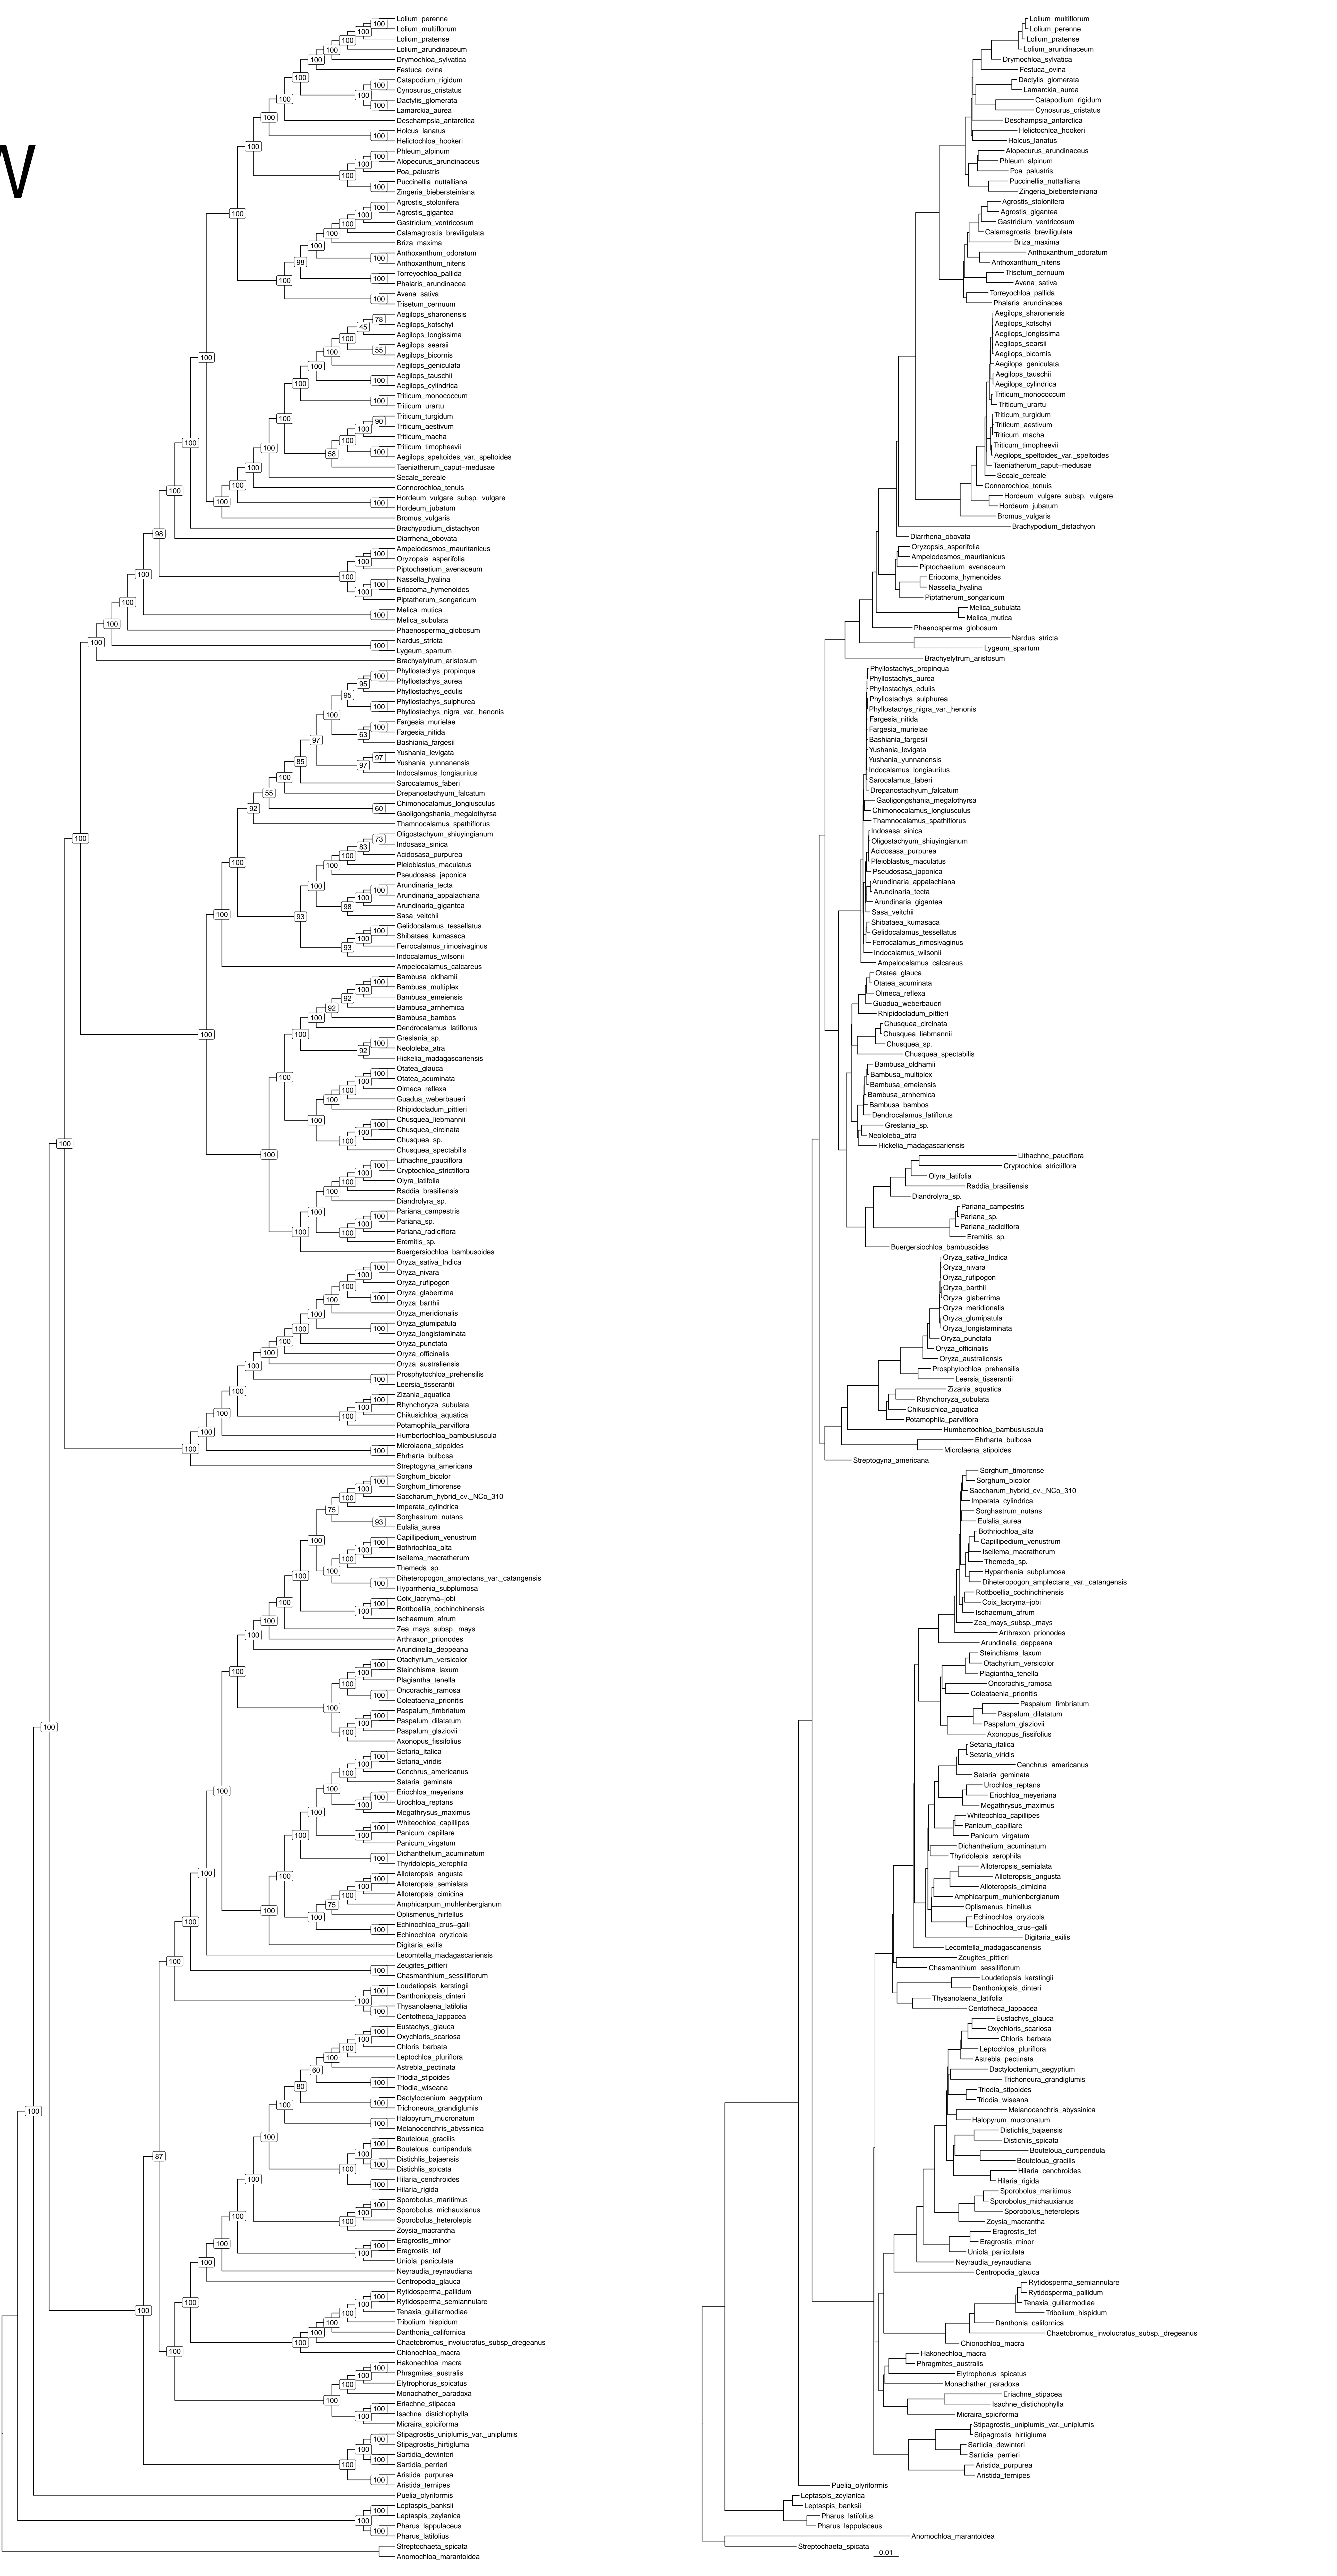





Z

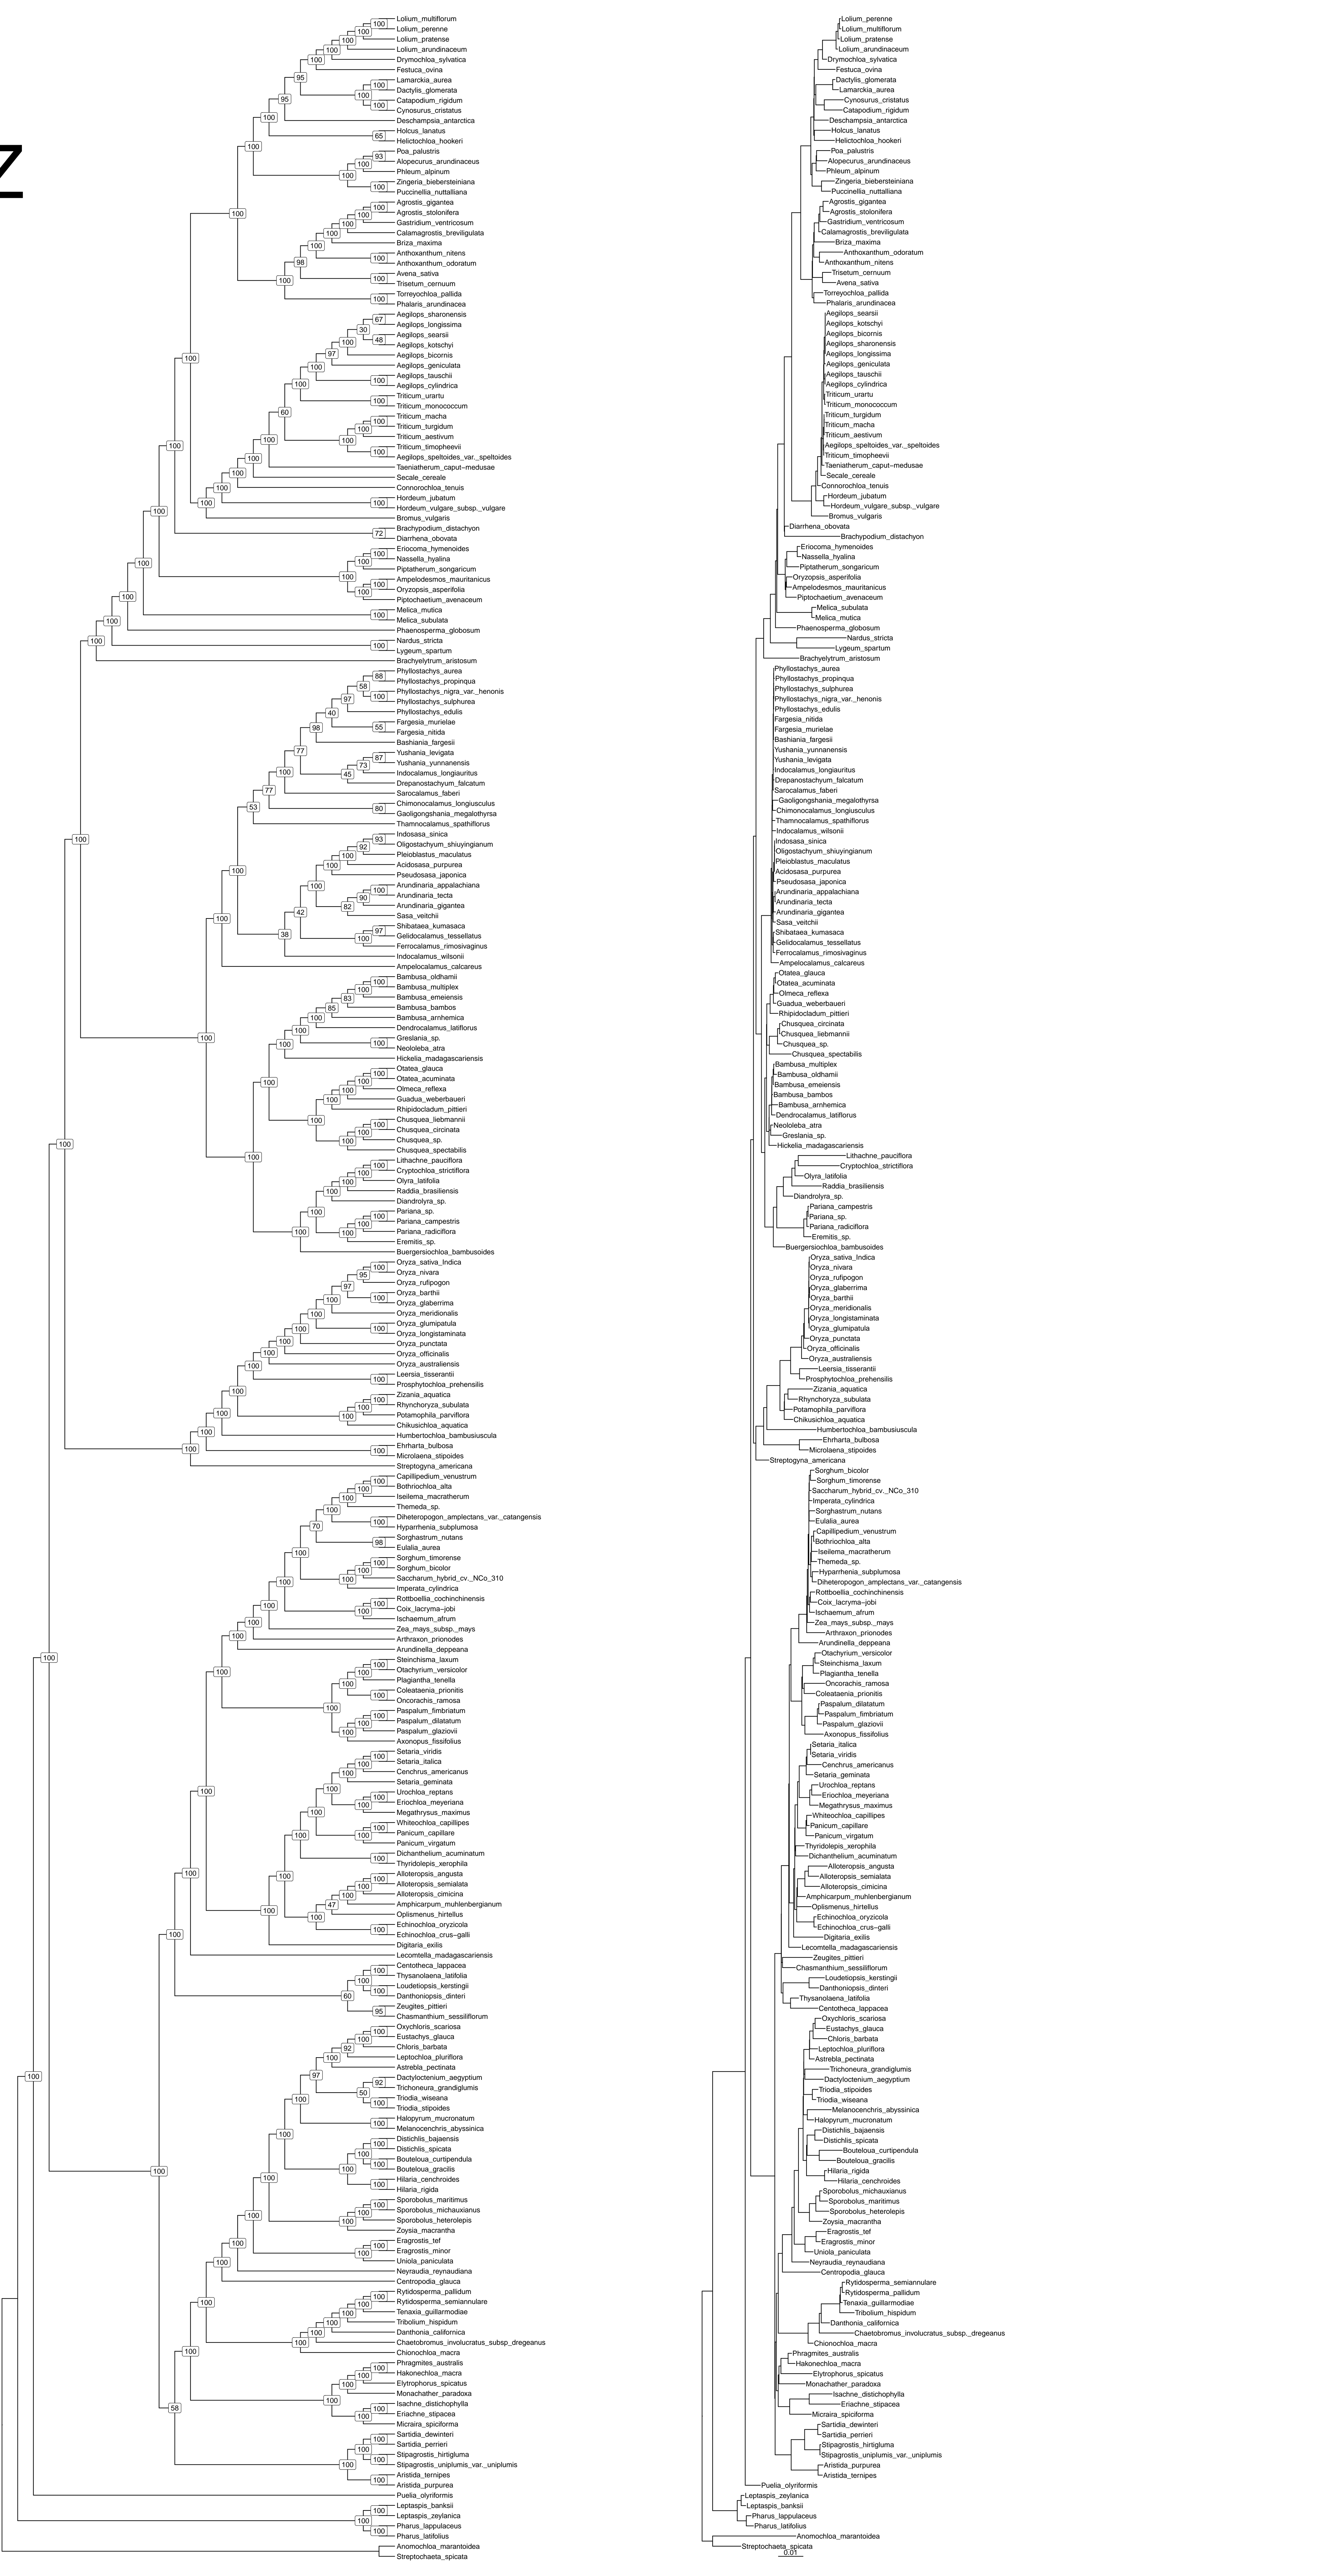

Supplement: peerj-06-4299-s002.pdf [file peerj-06-4299-s002.pdf]
