# Supplementary material for: A 250 plastome phylogeny of the grass family (Poaceae): topological support under different data partitions
Source: PeerJ. 2018 Feb 2;6:e4299. doi: 10.7717/peerj.4299 (PMC5798404; doi:10.7717/peerj.4299)
Supplement: Supplemental Information 1 — Accession numbers in bold identify plastomes newly generated as part of this study. [file peerj-06-4299-s001.xlsx]

## Sheet: Supplementary Table 1
Taxon	GenBank accession number	Major clade	Subfamily	Supertribe	Tribe	Supersubtribe	Subtribe	Source
Acidosasa purpurea (Hsueh & T.P. Yi) Keng f.	NC015820	BOP	Bambusoideae		Arundinarieae		Arundinariinae	Zhang et al. 2011
Aegilops bicornis (Forssk.) Jaub. & Spach	NC024831	BOP	Pooideae	Triticodae	Triticeae		Triticinae	Gornicki, 2014
Aegilops cylindrica Host	NC023096	BOP	Pooideae	Triticodae	Triticeae		Triticinae	Middleton et al. 2014
Aegilops geniculata Roth	NC023097	BOP	Pooideae	Triticodae	Triticeae		Triticinae	Middleton et al. 2014
Aegilops kotschyi Boiss.	NC024832	BOP	Pooideae	Triticodae	Triticeae		Triticinae	Gornicki et al. 2014
Aegilops longissima Schweinf. & Muschl.	NC024830	BOP	Pooideae	Triticodae	Triticeae		Triticinae	Gornicki et al. 2014
Aegilops searsii Feldman & Kislev	NC024815	BOP	Pooideae	Triticodae	Triticeae		Triticinae	Gornicki et al. 2014
Aegilops sharonensis Eig	NC024816	BOP	Pooideae	Triticodae	Triticeae		Triticinae	Gornicki et al. 2014
Aegilops speltoides Tausch var. speltoides	KJ614406	BOP	Pooideae	Triticodae	Triticeae		Triticinae	Gornicki et al. 2014
Aegilops tauschii Coss.	NC022133	BOP	Pooideae	Triticodae	Triticeae		Triticinae	Middleton et al. 2014
Agrostis gigantea Roth	MF460976	BOP	Pooideae	Poodae	Poeae (Grp 1)	Agrostidodinae	Agrostidinae	Current paper
Agrostis stolonifera L.	NC008591	BOP	Pooideae	Poodae	Poeae (Grp 1)	Agrostidodinae	Agrostidinae	Saski et al. 2007
Alloteropsis angusta Stapf	NC027951	PACMAD	Panicoideae	Panicodae	Paniceae		Boivinellinae	Lundgren et al. 2015
Alloteropsis cimicina (L.) Stapf	NC027952	PACMAD	Panicoideae	Panicodae	Paniceae		Boivinellinae	Lundgren et al. 2015
Alloteropsis semialata (R. Br.) Hitchc.	NC027824	PACMAD	Panicoideae	Panicodae	Paniceae		Boivinellinae	Lundgren et al. 2015
Alopecurus arundinaceus Poir.	MF460977	BOP	Pooideae	Poodae	Poeae (Grp 2)	Poodinae	Alopecurinae	Current paper
Ampelocalamus calcareus C.D. Chu & C.S. Chao	NC024731	BOP	Bambusoideae		Arundinarieae		Arundinariinae	Ma et al. 2014
Ampelodesmos mauritanicus (Poir.) T. Durand & Schinz	NC027466	BOP	Pooideae	Stipodae	Ampelodesmeae			Saarela et al. 2015
Amphicarpum muhlenbergianum (Schult.) Hitchc.	NC030619	PACMAD	Panicoideae	Panicodae	Paniceae		Boivinellinae	Burke et al. 2016b
Anomochloa marantoidea Brongn.	NC014062		Anomochlooideae		Anomochloeae			Morris and Duvall 2010
Anthoxanthum nitens (Weber) Y. Schouten & Veldkamp [published as Hierochloe odorata (L.) P. Beauv.]	NC027475	BOP	Pooideae	Poodae	Poeae (Grp 1)		Anthoxanthinae	Saarela et al. 2015
Anthoxanthum odoratum L.	NC027467	BOP	Pooideae	Poodae	Poeae (Grp 1)		Anthoxanthinae	Saarela et al. 2015
Aristida purpurea Nutt.	NC025228	PACMAD	Aristidoideae		Aristideae			Cotton et al. 2015
Aristida ternipes Cav.	MF460978	PACMAD	Aristidoideae		Aristideae			Current paper
Arthraxon prionodes (Steud.) Dandy	NC030613	PACMAD	Panicoideae	Andropogonodae	Andropogoneae		Arthraxoninae	Burke et al. 2016b
Arundinaria appalachiana Triplett, Weakley & L.G. Clark	NC023934	BOP	Bambusoideae		Arundinarieae		Arundinariinae	Burke et al. 2014
Arundinaria gigantea (Walter) Muhl.	NC020341	BOP	Bambusoideae		Arundinarieae		Arundinariinae	Burke et al. 2012
Arundinaria tecta (Walter) Muhl.	NC023935	BOP	Bambusoideae		Arundinarieae		Arundinariinae	Burke et al. 2014
Arundinella deppeana Nees ex Steud.	NC030620	PACMAD	Panicoideae	Andropogonodae	Arundinelleae			Burke et al. 2016b
Astrebla pectinata (Lindl.) F. Muell. ex Benth.	NC029891	PACMAD	Chloridoideae		Cynodonteae		Eleusininae	Duvall et al. 2016
Avena sativa L.	NC027468	BOP	Pooideae	Poodae	Poeae (Grp 1)		Aveninae	Saarela et al. 2015
Axonopus fissifolius (Raddi) Kuhlm.	NC030501	PACMAD	Panicoideae	Andropogonodae	Paspaleae		Paspalinae	Burke et al. 2016b
Bambusa arnhemica F. Muell.	KJ870989	BOP	Bambusoideae		Bambuseae		Bambusinae	Wysocki et al. 2015
Bambusa bambos (L.) Voss	KJ870988	BOP	Bambusoideae		Bambuseae		Bambusinae	Wysocki et al. 2015
Bambusa emeiensis L.C. Chia & H.L. Fung	NC015830	BOP	Bambusoideae		Bambuseae		Bambusinae	Zhang et al. 2011
Bambusa multiplex (Lour.) Raeusch. ex Schult. & Schult. f.	NC024668	BOP	Bambusoideae		Bambuseae		Bambusinae	Gao et al. 2016
Bambusa oldhamii Munro	NC012927	BOP	Bambusoideae		Bambuseae		Bambusinae	Wu et al. 2009
Bashania fargesii (E.G. Camus) Keng f. & T.P. Yi [plastome published as Arundinaria fargesii E.G. Camus]	NC024712	BOP	Bambusoideae		Arundinarieae		Arundinariinae	Ma et al. 2014
Bothriochloa alta (Hitchc.) Henrard	NC030621	PACMAD	Panicoideae	Andropogonodae	Andropogoneae		Andropogoninae	Burke et al. 2016b
Bouteloua curtipendula (Michx.) Torr.	NC029414	PACMAD	Chloridoideae		Cynodonteae	Boutelouodinae	Boutelouinae	Duvall et al. 2016
Bouteloua gracilis (Kunth) Lag. ex Griffiths	NC029892	PACMAD	Chloridoideae		Cynodonteae	Boutelouodinae	Boutelouinae	Duvall et al. 2016
Brachyelytrum aristosum (Michx.) P. Beauv. ex Trel.	NC027470	BOP	Pooideae		Brachyelytreae			Saarela et al. 2015
Brachypodium distachyon (L.) P. Beauv.	NC011032	BOP	Pooideae	Stipodae	Brachypodieae			Bortiri et al. 2008
Briza maxima L.	NC027471	BOP	Pooideae	Poodae	Poeae (Grp 1)	Agrostidodinae	Brizinae	Saarela et al. 2015
Bromus vulgaris (Hook.) Shear	NC027472	BOP	Pooideae	Triticodae	Bromeae			Saarela et al. 2015
Buergersiochloa bambusoides Pilg.	NC026968	BOP	Bambusoideae		Olyreae		Buergersiochloinae	Wysocki et al. 2015
Calamagrostis breviligulata (Fernald) Saarela [published as Ammophila breviligulata Fernald]	NC027465	BOP	Pooideae	Poodae	Poeae (Grp 1)	Agrostidodinae	Agrostidinae	Saarela et al. 2015
Capillipedium venustum (Thwaites) Bor	KU291493	PACMAD	Panicoideae	Andropogonodae	Andropogoneae		Andropogoninae	Burke et al. 2016b
Catapodium rigidum (L.) C.E. Hubb.	KY432804	BOP	Pooideae	Poodae	Poeae (Grp 2)	Loliodinae	Parapholiinae	Burke et al., unpublished data
Cenchrus americanus (L.) Morrone	NC024171	PACMAD	Panicoideae	Panicodae	Paniceae		Cenchrinae	Mariac et al. 2014
Centotheca lappacea (L.) Desv.	NC025229	PACMAD	Panicoideae		Centotheceae			Cotton et al. 2015
Centropodia glauca (Nees) Cope	NC029411	PACMAD	Chloridoideae		Centropodieae			Duvall et al. 2016
Chaetobromus involucratus subsp. dregeanus (Nees) Verboom	KJ920226	PACMAD	Danthonioideae		Danthonieae			Cotton et al. 2015
Chasmanthium sessiliflorum (Poir.) H.O. Yates	KU291494	PACMAD	Panicoideae		Chasmanthieae			Burke et al. 2016b
Chikusichloa aquatica Koidz.	KR078265	BOP	Oryzoideae		Oryzeae		Zizaniinae	Zhang et al. 2016b
Chimonocalamus longiusculus Hsueh & T.P. Yi	NC024714	BOP	Bambusoideae		Arundinarieae		Arundinariinae	Ma et al. 2014
Chionochloa macra Zotov	NC025230	PACMAD	Danthonioideae		Danthonieae			Cotton et al. 2015
Chloris barbata Sw.	NC029893	PACMAD	Chloridoideae		Cynodonteae		Eleusininae	Duvall et al. 2016
Chusquea circinata Soderstr. & C.E. Calderón	NC027490	BOP	Bambusoideae		Bambuseae		Chusqueinae	Ma et al. 2015
Chusquea Kunth sp.	KP319242	BOP	Bambusoideae		Bambuseae		Chusqueinae	Ma et al. 2014
Chusquea liebmannii E. Fourn.	KJ871001	BOP	Bambusoideae		Bambuseae		Chusqueinae	Wysocki et al. 2015
Chusquea spectabilis L.G. Clark	KJ870990	BOP	Bambusoideae		Bambuseae		Chusqueinae	Wysocki et al. 2015
Coix lacryma-jobi L.	NC013273	PACMAD	Panicoideae	Andropogonodae	Andropogoneae		Coicinae	Leseberg and Duvall 2009
Coleataenia prionitis (Nees) Soreng	NC025231	PACMAD	Panicoideae	Andropogonodae	Paspaleae		Arthropogoninae	Cotton et al. 2015
Connorochloa tenuis (Buchanan) Barkworth, S.W.L. Jacobs & H.Q. Zhang	MF460979	BOP	Pooideae	Triticodae	Triticeae		Triticinae	Current paper
Cryptochloa strictiflora (E. Fourn.) Swallen	JX235348	BOP	Bambusoideae		Olyreae		Olyrinae	Burke et al. 2012
Cynosurus cristatus L.	KY432806	BOP	Pooideae	Poodae	Poeae (Grp 2)	Loliodinae	Cynosurinae	Burke et al., unpublished data
Dactylis glomerata L.	NC027473	BOP	Pooideae	Poodae	Poeae (Grp 2)	Loliodinae	Dactylidinae	Saarela et al. 2015
Dactyloctenium aegyptium (L.) Willd.	KY432807	PACMAD	Chloridoideae		Cynodonteae		Dactylocteniinae	Burke et al., unpublished data
Danthonia californica Bol.	NC025232	PACMAD	Danthonioideae		Danthonieae			Cotton et al. 2015
Danthoniopsis dinteri (Pilg.) C.E. Hubb.	NC030502	PACMAD	Panicoideae		Tristachyideae			Burke et al. 2016b
Dendrocalamus latiflorus Munro	NC013088	BOP	Bambusoideae		Bambuseae		Bambusinae	Wu et al. 2009
Deschampsia antarctica E. Desv.	NC023533	BOP	Pooideae	Poodae	Poeae (Grp 2)		Aristaveninae	Lee et al. 2014
Diandrolyra Stapf sp.	NC026960	BOP	Bambusoideae		Olyreae		Olyrinae	Wysocki et al. 2015
Diarrhena obovata (Gleason) Brandenburg	NC027474	BOP	Pooideae	Stipodae	Diarrheneae			Saarela et al. 2015
Dichanthelium acuminatum (Sw.) Gould & C.A. Clark	NC030623	PACMAD	Panicoideae	Panicodae	Paniceae		Dichantheliinae	Burke et al. 2016b
Digitaria exilis (Kippist) Stapf	NC024176	PACMAD	Panicoideae	Panicodae	Paniceae		Anthephorinae	Mariac et al. 2014
Diheteropogon amplectens var. catangensis (Chiov.) Clayton	KU291497	PACMAD	Panicoideae	Andropogonodae	Andropogoneae		Andropogoninae	Burke et al. 2016b
Distichlis bajaensis H.L. Bell	NC029894	PACMAD	Chloridoideae		Cynodonteae	Boutelouodinae	Monanthochloinae	Duvall et al. 2016
Distichlis spicata (L.) Greene	NC029895	PACMAD	Chloridoideae		Cynodonteae	Boutelouodinae	Monanthochloinae	Duvall et al. 2016
Drepanostachyum falcatum (Nees) Keng f.	MF460981	BOP	Bambusoideae		Arundinarieae		Arundinariinae	Current paper
Drymochloa sylvatica (Pollich) Holub [published as Festuca altissima All.]	NC019648	BOP	Pooideae	Poodae	Poeae (Grp 2)	Loliodinae	Loliinae	Hand et al. 2013
Echinochloa crus-galli (L.) P. Beauv.	NC028719	PACMAD	Panicoideae	Panicodae	Paniceae		Boivinellinae	Nah et al. 2016
Echinochloa oryzicola (Vasinger) Vasinger	NC024643	PACMAD	Panicoideae	Panicodae	Paniceae		Boivinellinae	Ye et al. 2014
Ehrharta bulbosa Sm.	KY432808	BOP	Oryzoideae		Ehrharteae			Burke et al., unpublished data
Elytrophorus spicatus (Willd.) A. Camus	NC025233	PACMAD	Arundinoideae		Molinieae		Crinipinae	Cotton et al. 2015
Eragrostis minor Host	NC029412	PACMAD	Chloridoideae		Eragrostideae		Eragrostidinae	Duvall et al. 2016
Eragrostis tef (Zuccagni) Trotter	NC029413	PACMAD	Chloridoideae		Eragrostideae		Eragrostidinae	Duvall et al. 2016
Eremitis Döll sp.	KJ870992	BOP	Bambusoideae		Olyreae		Parianinae	Wysocki et al. 2015
Eriachne stipacea F. Muell.	NC025234	PACMAD	Micrairoideae		Eriachneae			Cotton et al. 2015
Eriochloa meyeriana (Nees) Pilg.	NC030624	PACMAD	Panicoideae	Panicodae	Paniceae		Melinidinae	Burke et al. 2016b
Eriocoma hymenoides (Roem. & Schult.) Rydb. [published as Achnatherum hymenoides (Roem. & Schult.) Barkworth]	KM974729	BOP	Pooideae	Stipodae	Stipeae			Saarela et al. 2015
Eulalia aurea (Bory) Kunth	NC030503	PACMAD	Panicoideae	Andropogonodae	Andropogoneae		Saccharinae	Burke et al. 2016b
Eustachys glauca Chapm.	KY432777	PACMAD	Chloridoideae		Cynodonteae		Eleusininae	Burke et al., unpublished data
Fargesia murielae (Gamble) T.P. Yi [plastome published as Fargesia spathacea Franch.]	NC024716	BOP	Bambusoideae		Arundinarieae		Arundinariinae	Ma et al. 2014
Fargesia nitida (Mitford ex Anonymous) Keng f. ex T.P. Yi	NC024715	BOP	Bambusoideae		Arundinarieae		Arundinariinae	Ma et al. 2014
Ferrocalamus rimosivaginus T.H. Wen	NC015831	BOP	Bambusoideae		Arundinarieae		Arundinariinae	Zhang et al. 2011
Festuca ovina L.	NC019649	BOP	Pooideae	Poodae	Poeae (Grp 2)	Loliodinae	Loliinae	Hand et al. 2013
Gaoligongshania megalothyrsa (Hand.-Mazz.) D.Z. Li, Hsueh & N.H. Xia	NC024718	BOP	Bambusoideae		Arundinarieae		Arundinariinae	Ma et al. 2014
Gastridium ventricosum (Gouan) Schinz & Thell.	KY432778	BOP	Pooideae	Poodae	Poeae (Grp 1)	Agrostidodinae	Agrostidinae	Burke et al., unpublished data
Gelidocalamus tessellatus T.H. Wen & C.C. Chang	NC024719	BOP	Bambusoideae		Arundinarieae		Arundinariinae	Ma et al. 2014
Greslania Balansa sp.	KJ870993	BOP	Bambusoideae		Bambuseae		Greslaninae	Wysocki et al. 2015
Guadua weberbaueri Pilg.	KP793062	BOP	Bambusoideae		Bambuseae		Guaduinae	Wysocki et al. 2015
Hakonechloa macra (Munro) Honda	NC025235	PACMAD	Arundinoideae		Molinieae		Molininae	Cotton et al. 2015
Halopyrum mucronatum (L.) Stapf	KY432780	PACMAD	Chloridoideae		Cynodonteae		Tripogoninae	Burke et al., unpublished data
Helictochloa hookeri (Scribn.) Romero Zarco	NC027469	BOP	Pooideae	Poodae	Poeae (Grp 2)		Airinae	Saarela et al. 2015
Hickelia madagascariensis A. Camus	KJ870994	BOP	Bambusoideae		Bambuseae		Hickeliinae	Wysocki et al. 2015
Hilaria cenchroides Kunth	NC029415	PACMAD	Chloridoideae		Cynodonteae	Boutelouodinae	Hilariinae	Hajek et al. unpublished
Hilaria rigida (Thurb.) Benth. ex Scribn.	NC029896	PACMAD	Chloridoideae		Cynodonteae	Boutelouodinae	Hilariinae	Duvall et al. 2016
Holcus lanatus L.	KY432781	BOP	Pooideae	Poodae	Poeae (Grp 2)		Holcinae	Burke et al., unpublished data
Hordeum jubatum L.	NC027476	BOP	Pooideae	Triticodae	Triticeae		Trtiticinae	Saarela et al. 2015
Hordeum vulgare L. subsp. vulgare	NC_008590	BOP	Pooideae	Triticodae	Triticeae		Triticinae	Saski et al. 2007
Humbertochloa bambusiuscula A. Camus & Stapf	KY432783	BOP	Oryzoideae		Oryzeae		Phyllorachideae	Burke et al., unpublished data
Hyparrhenia subplumosa Stapf	NC030625	PACMAD	Panicoideae	Andropogonodae	Andropogoneae		Andropogoninae	Burke et al. 2016b
Imperata cylindrica (L.) P. Beauv.	NC030487	PACMAD	Panicoideae	Andropogonodae	Andropogoneae		Saccharinae	Burke et al. 2016b
Indocalamus longiauritus Hand.-Mazz.	NC015803	BOP	Bambusoideae		Arundinarieae		Arundinariinae	Zhang et al. 2011
Indocalamus wilsonii (Rendle) C.S. Chao & C.D. Chu	NC024720	BOP	Bambusoideae		Arundinarieae		Arundinariinae	Ma et al. 2014
Indosasa sinica C.D. Chu & C.S. Chao	NC024721	BOP	Bambusoideae		Arundinarieae		Arundinariinae	Ma et al. 2014
Isachne distichophylla Munro ex Hillebr.	NC025236	PACMAD	Micrairoideae		Isachneae			Cotton et al. 2015
Ischaemum afrum (J.F. Gmel.) Dandy	NC030488	PACMAD	Panicoideae	Andropogonodae	Andropogoneae		Ischaeminae	Burke et al. 2016b
Iseilema macratherum Domin	NC030611	PACMAD	Panicoideae	Andropogonodae	Andropogoneae		Andropogoninae	Burke et al. 2016b
Lamarckia aurea (L.) Moench	MF460982	BOP	Pooideae	Poodae	Poeae (Grp 2)	Loliodinae	Dactylidinae	Current paper
Lecomtella madagascariensis A. Camus	NC024106	PACMAD	Panicoideae		Lecomtelleae			Besnard et al. 2013
Leersia tisserantii (A. Chev.) Launert	NC016677	BOP	Oryzoideae		Oryzeae		Oryzinae	Wu and Ge 2012
Leptaspis banksii R. Br.	KU666545		Pharoideae		Phareae			Burke et al. 2016a
Leptaspis zeylanica Nees ex Steud.	KU666546		Pharoideae		Phareae			Burke et al. 2016a
Leptochloa pluriflora (E. Fourn.) P.M. Peterson & N. Snow	MF460983	PACMAD	Chloridoideae		Cynodonteae		Eleusininae	Current paper
Lithachne pauciflora (Sw.) P. Beauv.	KJ871002	BOP	Bambusoideae		Olyreae		Olyrinae	Wysocki et al. 2015
Lolium arundinaceum (Schreb.) Darbysh. [published as Schedonorus arundinaceus (Schreb.) Dumort.]	KM974751	BOP	Pooideae	Poodae	Poeae (Grp 2)	Loliodinae	Loliinae	Saarela et al. 2015
Lolium multiflorum Lam.	NC019651	BOP	Pooideae	Poodae	Poeae (Grp 2)	Loliodinae	Loliinae	Hand et al. 2013
Lolium perenne L.	NC009950	BOP	Pooideae	Poodae	Poeae (Grp 2)	Loliodinae	Loliinae	Diekmann et al. 2009
Lolium pratense (Huds.) Darbysh. [published as Festuca pratensis Huds.]	NC019650	BOP	Pooideae	Poodae	Poeae (Grp 2)	Loliodinae	Loliinae	Hand et al. 2013
Loudetiopsis kerstingii (Pilg.) Conert	NC030612	PACMAD	Panicoideae		Tristachyideae			Burke et al. 2016b
Lygeum spartum L.	KY432785	BOP	Pooideae	Nardodae	Lygeeae			Burke et al., unpublished data
Megathyrsus maximus (Jacq.) B.K. Simon & S.W.L. Jacobs [plastome publisedh as Panicum maximum Jacq.]	NC030489	PACMAD	Panicoideae	Panicodae	Paniceae		Melinidinae	Burke et al. 2016b
Melanocenchris abyssinica (R. Br. ex Fresen.) Hochst.	KY432786	PACMAD	Chloridoideae		Cynodonteae		Tripogoninae	Burke et al., unpublished data
Melica mutica Walter	NC027477	BOP	Pooideae	Melicodae	Meliceae			Saarela et al. 2015
Melica subulata (Griseb.) Scribn.	NC027478	BOP	Pooideae	Melicodae	Meliceae			Saarela et al. 2015
Micraira spiciforma Lazarides	KJ920234	PACMAD	Micrairoideae		Micraireae			Cotton et al. 2015
Microlaena stipoides (Labill.) R. Br.	GU592211	BOP	Oryzoideae		Ehrharteae			Nock et al. 2011
Monachather paradoxa Steud.	NC025237	PACMAD	Arundinoideae		Arundineae			Cotton et al. 2015
Nardus stricta L.	KY432787	BOP	Pooideae	Nardodae	Nardeae			Burke et al., unpublished data
Nassella hyalina (Nees) Barkworth	KY432788	BOP	Pooideae	Stipodae	Stipeae			Burke et al., unpublished data
Neololeba atra (Lindl.) Widjaja	NC026964	BOP	Bambusoideae		Bambuseae		Dinochloinae	Wysocki et al. 2015
Neyraudia reynaudiana (Kunth) Keng ex Hitchc.	NC024262	PACMAD	Chloridoideae		Triraphideae			Wysocki et al. 2014
Oligostachyum shiuyingianum (L.C. Chia & P. But) G.H. Ye & Z.P. Wang	NC024722	BOP	Bambusoideae		Arundinarieae		Arundinariinae	Ma et al. 2014
Olmeca reflexa Soderstr.	KJ870997	BOP	Bambusoideae		Bambuseae		Guaduinae	Wysocki et al. 2015
Olyra latifolia L.	KF515509	BOP	Bambusoideae		Olyreae		Olyrinae	Burke et al. 2014
Oncorachis ramosa (Zuloaga & Soderstr.) Morrone & Zuloaga	NC030490	PACMAD	Panicoideae	Andropogonodae	Paspaleae		Arthropogoninae	Burke et al. 2016b
Oplismenus hirtellus (L.) P. Beauv.	NC030491	PACMAD	Panicoideae	Panicodae	Paniceae		Boivinellinae	Burke et al. 2016b
Oryza australiensis Domin	NC024608	BOP	Oryzoideae		Oryzeae		Oryzinae	Wu and Ge 2016
Oryza barthii A. Chev.	KM088023	BOP	Oryzoideae		Oryzeae		Oryzinae	Kim et al. 2015
Oryza glaberrima Steud.	KM088021	BOP	Oryzoideae		Oryzeae		Oryzinae	Kim et al. 2015
Oryza glumipatula Steud.	NC027461	BOP	Oryzoideae		Oryzeae		Oryzinae	Wambugu et al. 2015
Oryza longistaminata A. Chev. & Roehr.	KM088024	BOP	Oryzoideae		Oryzeae		Oryzinae	Kim et al. 2015
Oryza meridionalis N.Q. Ng	NC016927	BOP	Oryzoideae		Oryzeae		Oryzinae	Waters et al. 2012
Oryza nivara Sharma & Shastry	KM088022	BOP	Oryzoideae		Oryzeae		Oryzinae	Kim et al. 2015
Oryza officinalis Wall. ex G. Watt	NC027463	BOP	Oryzoideae		Oryzeae		Oryzinae	Wambugu et al. 2015
Oryza punctata Kotschy ex Steud.	NC027676	BOP	Oryzoideae		Oryzeae		Oryzinae	Kim et al. 2015
Oryza rufipogon Griff.	NC017835	BOP	Oryzoideae		Oryzeae		Oryzinae	Waters et al. 2012
Oryza sativa L. 'Indica' [plastome published as Oryza sativa Indica Group]	JN861110	BOP	Oryzoideae		Oryzeae		Oryzinae	Zhang et al. 2012
Oryzopsis asperifolia Michx.	NC027479	BOP	Pooideae	Stipodae	Stipeae			Saarela et al. 2015
Otachyrium versicolor (Döll) Henrard	NC030492	PACMAD	Panicoideae	Andropogonodae	Paspaleae		Otachyriinae	Burke et al. 2016b
Otatea acuminata (Munro) C.E. Calderón & Soderstr.	KJ871003	BOP	Bambusoideae		Bambuseae		Guaduinae	Wysocki et al. 2015
Otatea glauca L.G. Clark & G. Cortés	NC028631	BOP	Bambusoideae		Bambuseae		Guaduinae	Ma et al. 2015
Oxychloris scariosa (F. Muell.) Lazarides	MF460971	PACMAD	Chloridoideae		Cynodonteae		Eleusininae	Current paper
Panicum capillare L.	NC030493	PACMAD	Panicoideae	Panicodae	Paniceae		Panicinae	Burke et al. 2016b
Panicum virgatum L.	NC015990	PACMAD	Panicoideae	Panicodae	Paniceae		Panicinae	Young et al. 2011
Pariana Aubl. sp.	KP319246	BOP	Bambusoideae		Olyreae		Parianinae	Ma et al. 2015
Pariana campestris Aubl.	NC027491	BOP	Bambusoideae		Olyreae		Parianinae	Ma et al. 2015
Pariana radiciflora Sagot ex Döll	KJ871004	BOP	Bambusoideae		Olyreae		Parianinae	Wysocki et al. 2015
Paspalum dilatatum Poir.	NC030614	PACMAD	Panicoideae	Andropogonodae	Paspaleae		Paspalinae	Burke et al. 2016b
Paspalum fimbriatum Kunth	NC030495	PACMAD	Panicoideae	Andropogonodae	Paspaleae		Paspalinae	Burke et al. 2016b
Paspalum glaziovii (A.G. Burm.) S. Denham	NC030496	PACMAD	Panicoideae	Andropogonodae	Paspaleae		Paspalinae	Burke et al. 2016b
Phaenosperma globosum Munro ex Benth.	NC027480	BOP	Pooideae	Nardodae	Phaenospermateae			Saarela et al. 2015
Phalaris arundinacea L.	NC027481	BOP	Pooideae	Poodae	Poeae (Grp 1)		Phalaridinae	Saarela et al. 2015
Pharus lappulaceus Aubl.	NC023245		Pharoideae		Phareae			Jones et al. 2014
Pharus latifolius L.	NC021372		Pharoideae		Phareae			Jones et al. 2014
Phleum alpinum L.	NC027482	BOP	Pooideae	Poodae	Poeae (Grp 2)	Poodinae	Phleinae	Saarela et al. 2015
Phragmites australis (Cav.) Trin. ex Steud.	KX229727	PACMAD	Arundinoideae		Molinieae		Molininae	Duvall et al. 2017
Phyllostachys aurea Carrière ex Rivière & C. Rivière	KU569973	BOP	Bambusoideae		Arundinarieae		Arundinariinae	Attigala et al. 2016
Phyllostachys edulis (Carrière) J. Houz.	NC015817	BOP	Bambusoideae		Arundinarieae		Arundinariinae	Zhang et al. 2011
Phyllostachys nigra var. henonis (Mitford) Stapf ex Rendle	NC015826	BOP	Bambusoideae		Arundinarieae		Arundinariinae	Zhang et al. 2011
Phyllostachys propinqua McClure	NC016699	BOP	Bambusoideae		Arundinarieae		Arundinariinae	Wu and Ge 2012
Phyllostachys sulphurea (Carrière) Rivière & C. Rivière	NC024669	BOP	Bambusoideae		Arundinarieae		Arundinariinae	Gao and Gao 2016
Piptatherum songaricum (Trin. & Rupr.) Roshev. ex Nikitina	KY432791	BOP	Pooideae	Stipodae	Stipeae			Burke et al., unpublished data
Piptochaetium avenaceum (L.) Parodi	NC027483	BOP	Pooideae	Stipodae	Stipeae			Saarela et al. 2015
Plagiantha tenella Renvoize	NC030497	PACMAD	Panicoideae	Andropogonodae	Paspaleae		Otachyriinae	Burke et al. 2016b
Pleioblastus maculatus (McClure) C.D. Chu & C.S. Chao	NC024723	BOP	Bambusoideae		Arundinarieae		Arundinariinae	Ma et al. 2014
Poa palustris L.	NC027484	BOP	Pooideae	Poodae	Poeae (Grp 2)	Poodinae	Poinae	Saarela et al. 2015
Potamophila parviflora R. Br.	GU592210	BOP	Oryzoideae		Oryzeae		Zizaniinae	Nock et al. 2011
Prosphytochloa prehensilis (Nees) Schweick.	MF460972	BOP	Oryzoideae		Oryzeae		Oryzinae	Current paper
Pseudosasa japonica (Siebold & Zucc. ex Steud.) Makino ex Nakai	NC028328	BOP	Bambusoideae		Arundinarieae		Arundinariinae	Zhou et al. 2016
Puccinellia nuttalliana (Schult.) Hitchc.	NC027485	BOP	Pooideae	Poodae	Poeae (Grp 2)		Coleanthinae	Saarela et al. 2015
Puelia olyriformis (Franch.) Clayton	NC023449		Puelioideae		Atractocarpeae			Jones et al. 2014
Raddia brasiliensis Bertol.	KJ870998	BOP	Bambusoideae		Olyreae		Olyrinae	Wysocki et al. 2015
Rhipidocladum pittieri (Hack.) McClure	KY432792	BOP	Bambusoideae		Bambuseae		Arthrostylidiinae	Burke et al., unpublished data
Rhynchoryza subulata (Nees) Baill.	NC016718	BOP	Oryzoideae		Oryzeae		Zizaniinae	Wu and Ge 2012
Rottboellia cochinchinensis (Lour.) Clayton	NC030615	PACMAD	Panicoideae	Andropogonodae	Andropogoneae		Rottboelliinae	Burke et al. 2016b
Rytidosperma pallidum (R. Br.) A.M. Humphreys & H.P. Linder	MF460980	PACMAD	Danthonioideae		Danthonieae			Current paper
Rytidosperma semiannulare (Labill.) Connor & Edgar	KY432793	PACMAD	Danthonioideae		Danthonieae			Burke et al., unpublished data
Saccharum hybrid cv. NCo 310	AP006714	PACMAD	Panicoideae	Andropogonodae	Andropogoneae		Saccharinae	Asano et al. 2004
Sarocalamus faberi (Rendle) Stapleton	NC024713	BOP	Bambusoideae		Arundinarieae		Arundinariinae	Ma et al. 2014
Sartidia dewinteri Munday & L. Fish	NC027147	PACMAD	Aristidoideae		Aristideae			Besnard et al. 2014
Sartidia perrieri (A. Camus) Bourreil	NC027146	PACMAD	Aristidoideae		Aristideae			Besnard et al. 2014
Sasa veitchii (Carrière) Rehder	KU569975	BOP	Bambusoideae		Arundinarieae		Arundinariinae	Attigala et al. 2016
Secale cereale L.	NC021761	BOP	Pooideae	Triticodae	Triticeae		Trtiticinae	Middleton et al. 2014
Setaria geminata (Forskk.) Veldkamp [plastome published as Paspalidium geminatum (Forssk.) Stapf]	NC030494	PACMAD	Panicoideae	Panicodae	Paniceae		Cenchrinae	Burke et al. 2016b
Setaria italica (L.) P. Beauv.	NC022850	PACMAD	Panicoideae	Panicodae	Paniceae		Cenchrinae	Wang and Gao 2015
Setaria viridis (L.) P. Beauv.	NC028075	PACMAD	Panicoideae	Panicodae	Paniceae		Cenchrinae	Wang and Gao 2016
Shibataea kumasaca (Zoll. ex Steud.) Makino	KU523578	BOP	Bambusoideae		Arundinarieae		Arundinariinae	Attigala et al. 2016
Sorghastrum nutans (L.) Nash	NC030498	PACMAD	Panicoideae	Andropogonodae	Andropogoneae		Saccharinae	Burke et al. 2016b
Sorghum bicolor (L.) Moench	EF115542	PACMAD	Panicoideae	Andropogonodae	Andropogoneae		Saccharinae	Saski et al. 2007
Sorghum timorense (Kunth) Buse	NC023800	PACMAD	Panicoideae	Andropogonodae	Andropogoneae		Saccharinae	Keepers et al. unpublished
Sporobolus heterolepis (A. Gray) A. Gray	NC029417	PACMAD	Chloridoideae		Zoysieae		Sporobolinae	Duvall et al. 2016
Sporobolus maritimus (Curtis) P.M. Peterson & Saarela [plastome published as Spartina maritima Curtis]	NC027650	PACMAD	Chloridoideae		Zoysieae		Sporobolinae	Rousseau-Gueutin et al. 2015
Sporobolus michauxianus (Hitchc.) P.M. Peterson & Saarela [plastome published as Spartina pectinata Link]	NC029416	PACMAD	Chloridoideae		Zoysieae		Sporobolinae	Duvall et al. 2016
Steinchisma laxum (Sw.) Zuloaga	NC030499	PACMAD	Panicoideae	Andropogonodae	Paspaleae		Otachyriinae	Burke et al. 2016b
Stipagrostis hirtigluma (Steud. ex Trin. & Rupr.) De Winter	KY432797	PACMAD	Aristidoideae		Aristideae			Burke et al, unpublished data
Stipagrostis uniplumis (Licht. ex Roem. & Schult.) De Winter var. uniplumis	MF460973	PACMAD	Aristidoideae		Aristideae			Current paper
Streptochaeta spicata Schrad. ex Nees	KU666544		Anomochlooideae		Streptochaeteae			Burke et al., 2016b
Streptogyna americana C.E. Hubb.	KY432812	BOP	Oryzoideae		Streptogyneae			Burke et al., unpublished data
Taeniatherum caput-medusae (L.) Nevski	MF460974	BOP	Pooideae	Triticodae	Triticeae		Trtiticinae	Current paper
Tenaxia guillarmodiae (Conert) N.P. Barker & H.P. Linder	NC029897	PACMAD	Danthonioideae		Danthonieae			Duvall et al. 2016
Thamnocalamus spathiflorus (Trin.) Munro	KJ871005	BOP	Bambusoideae		Arundinarieae		Arundinariinae	Wysocki et al. 2015
Themeda Forskk. sp.	KU291484	PACMAD	Panicoideae	Andropogonodae	Andropogoneae		Andropogoninae	Burke et al. 2016b
Thyridolepis xerophila (Domin) S.T. Blake	NC030616	PACMAD	Panicoideae	Panicodae	Paniceae		Neurachninae	Burke et al. 2016b
Thysanolaena latifolia (Roxb. ex Hornem.) Honda	NC025238	PACMAD	Panicoideae		Thysanolaeneae			Cotton et al. 2015
Torreyochloa pallida (Torr.) G.L. Church	NC027486	BOP	Pooideae	Poodae	Poeae (Grp 1)		Torreyochloinae	Saarela et al. 2015
Tribolium hispidum (Thunb.) Desv.	KY432798	PACMAD	Danthonioideae		Danthonieae			Burke et al., unpublished data
Trichoneura grandiglumis (Nees) Ekman	KY432800	PACMAD	Chloridoideae		Cynodonteae		Trichoneurinae	Burke et al., unpublished data
Triodia stipoides (S.W.L. Jacobs ) Crisp & Mant	MF460970	PACMAD	Chloridoideae		Cynodonteae		Triodiinae	Current paper
Triodia wiseana C.A. Gardner	MF460975	PACMAD	Chloridoideae		Cynodonteae		Triodiinae	Current paper
Trisetum cernuum Trin.	NC027487	BOP	Pooideae	Poodae	Poeae (Grp 1)		Aveninae	Saarela et al. 2015
Triticum aestivum L.	KC912694	BOP	Pooideae	Triticodae	Triticeae		Triticinae	Middleton et al. 2014
Triticum macha Dekapr. & Menabde	NC025955	BOP	Pooideae	Triticodae	Triticeae		Triticinae	Gogniashvili, 2015
Triticum monococcum L.	NC021760	BOP	Pooideae	Triticodae	Triticeae		Triticinae	Middleton et al. 2014
Triticum timopheevii (Zhuk.) Zhuk.	NC024764	BOP	Pooideae	Triticodae	Triticeae		Triticinae	Gornicki, 2014
Triticum turgidum L.	KJ614398	BOP	Pooideae	Triticodae	Triticeae		Triticinae	Gornicki, 2014
Triticum urartu Thumanjan ex Gandilyan	NC021762	BOP	Pooideae	Triticodae	Triticeae		Triticinae	Middleton et al. 2014
Uniola paniculata L.	KY432802	PACMAD	Chloridoideae		Eragrostideae		Unioliinae	Burke et al., unpublished data
Urochloa reptans (L.) Stapf [plastome published as Brachiaria reptans (L.) C.A. Gardner & C.E. Hubb.]	NC030617	PACMAD	Panicoideae	Panicodae	Paniceae		Melinidinae	Burke et al. 2016b
Whiteochloa capillipes (Benth.) Lazarides	NC030618	PACMAD	Panicoideae	Panicodae	Paniceae		Panicinae	Burke et al. 2016b
Yushania levigata T.P. Yi	NC024725	BOP	Bambusoideae		Arundinarieae		Arundinariinae	Ma et al. 2014
Yushania yunnanensis (Hsueh & T.P. Yi) Keng f. & T.H. Wen [plastome published as Fargesia yunnanensis Hsueh & T.P. Yi]	NC024717	BOP	Bambusoideae		Arundinarieae		Arundinariinae	Ma et al. 2014
Zea mays L. subsp. mays	KF241980	PACMAD	Panicoideae	Andropogonodae	Andropogoneae		Tripsacinae	Bosacchi et al. 2015
Zeugites pittieri Hack.	NC030500	PACMAD	Panicoideae		Zeugiteae			Burke et al. 2016b
Zingeria biebersteiniana (Claus) P.A. Smirn.	MF460984	BOP	Pooideae	Poodae	Poeae (Grp 2)		Coleanthinae	Current paper
Zizania aquatica L.	NC026967	BOP	Oryzoideae		Oryzeae		Zizaniinae	Wysocki et al. 2015
Zoysia macrantha Desv.	NC029418	PACMAD	Chloridoideae		Zoysieae		Zoysiinae	Duvall et al. 2016
