# Supplementary material for: A 250 plastome phylogeny of the grass family (Poaceae): topological support under different data partitions
Source: PeerJ. 2018 Feb 2;6:e4299. doi: 10.7717/peerj.4299 (PMC5798404; doi:10.7717/peerj.4299)
Supplement: Supplemental Information 18 — Clades were first named based on tree X, a reference tree. Unique clades in non-reference trees were also named and scored across all trees. [file peerj-06-4299-s018.xlsx]

## Sheet: Saarela & al. Suppl. Dataset 16
Sort	Node number	Subfamily	Clade	A	B	C	D	E	F	G	H	Q	R	W	X	Y	Z	not present in AtoD and present in all others	100% in all	100% in E-Z	maximally supported in at least one plastome tree	≥ 50% in all plastome trees	≥ 50% in only one plastome trees	100% in A-D and E-H	present in A, B, C or D but not E, F, G or H
1	1	Backbone	Pharoideae [Leptaspis + Pharus] + Puelioideae [Puelia] + BOP + PACMAD	50	50	50	50	50	50	50	50	50	50	50	50	50	50					X
2	2	Backbone	Puelioideae [Puelia] + BOP + PACMAD	100	100	100	100	100	100	100	100	100	100	100	100	100	100		X	X	X	X		X
3	3	Backbone	PACMAD [Panicoideae + Aristidoideae + Arundinoideae + Micrairoideae + Danthonioideae + Chloridoideae]	100	100	100	100	100	100	100	100	100	100	100	100	100	100		X	X	X	X		X
4	4	Backbone	PCMAD [Panicoideae + Arundinoideae + Micrairoideae + Danthonioideae + Chloridoideae] {aristidoid sister topology}	87	–	68.5185	–	–	–	–	–	93.3333	–	86.6667	–	100	–				X				X
5	5	Backbone	ACMAD [Aristidoideae + Arundinoideae + Micrairoideae + Danthonioideae + Chloridoideae] {panicoid sister topology}	–	–	–	53.2051	–	–	–	–	–	93.3333	–	–	–	58.3333								X
6	6	Backbone	Aristidoideae + Panicoideae	–	–	–	–	–	51.6667	–	–	–	–	–	–	–	–						X
7	7	Backbone	CMAD [Arundinoideae + Micrairoideae + Danthonioideae + Chloridoideae]	72	–	75	–	100	100	100	100	100	96.4286	100	100	100	100				X	X
8	8	Backbone	Arundinoideae + Micrairoideae	97	90.3846	100	99.359	100	100	100	100	100	100	100	100	100	100			X	X	X
9	9	Backbone	Danthonioideae + Chloridoideae	94	89	94.4444	92.3077	100	100	100	100	100	78	100	100	100	100				X	X
10	10	Backbone	BOP + PACMAD	100	100	100	100	100	100	100	100	100	100	100	100	100	100		X	X	X	X		X
11	11	Backbone	BOP [Bambusoideae + Oryzoideae + Pooideae]	99	96	100	100	100	100	100	100	100	100	100	100	88.3333	100				X	X
12	12	Backbone	Pooideae + Bambusoideae	98	96	100	100	100	100	100	100	100	100	100	100	100	100			X	X	X
13	13	Pharoideae	Pharoideae [Leptaspis + Pharus]	100	100	100	100	100	100	100	100	100	100	100	100	100	100		X	X	X	X		X
14	14	Pharoideae	Leptaspis	100	100	100	100	100	100	100	100	100	100	100	100	100	100		X	X	X	X		X
15	15	Pharoideae	Pharus	100	100	100	100	100	100	100	100	100	100	100	100	100	100		X	X	X	X		X
16	16	Aristidoideae	Aristidoideae [Sartidia + Stipagrostis + Aristida]	100	100	100	100	100	100	100	100	100	100	100	100	100	100		X	X	X	X		X
17	17	Aristidoideae	Aristida [Aristida purpurea + Aristida ternipes]	100	100	100	100	100	100	100	100	100	100	100	100	100	100		X	X	X	X		X
18	18	Aristidoideae	Sartidia + Stipagrostis	100	100	100	100	100	100	100	100	100	100	100	100	100	100		X	X	X	X		X
19	19	Aristidoideae	Stipagrostis [Stipagrostis hirtigluma + Stipagrostis uniglumis]	100	100	100	100	100	100	100	100	100	100	100	100	100	100		X	X	X	X		X
20	20	Aristidoideae	Sartidia [Sartidia perrieri + Sartidia dewinteri]	100	100	100	100	100	100	100	100	100	100	100	100	100	100		X	X	X	X		X
21	21	Micrairoideae	Micrairoideae [Eriachne + Isachne + Micraira]	100	100	100	100	100	100	100	100	100	100	100	100	100	100		X	X	X	X		X
22	22	Micrairoideae	Eriachne + Isachne	100	100	100	100	100	100	100	100	100	100	100	100	100	100		X	X	X	X		X
23	23	Arundinoideae	Arundinoideae [Phragmites + Hakonechloa + Elytrophorus + Monachather]	–	–	–	–	100	98.3333	93.3333	96.6667	100	96.6667	100	100	96.6667	100	X			X	X
24	24	Arundinoideae	Arundineae [Monachather] + Micrairoideae	–	–	–	72.4359	–	–	–	–	–	–	–	–	–	–								X
25	25	Arundinoideae	Molinineae [Crinipinae [Elytrophorus] + Molininae [Hackonechloa + Phragmites]]	–	–	–	53.2051	100	100	100	100	100	78.3333	100	100	100	100				X	X
26	26	Arundinoideae	Molininae [Hackonechloa + Phragmites]	100	100	100	100	100	100	100	100	100	100	100	100	100	100		X	X	X	X		X
27	27	Danthonioideae	Danthonioideae [Chionochloa + Chaetobromus + Danthonia + Tribolium + Tenaxia + Rytidosperma]	100	100	100	100	100	100	100	100	100	100	100	100	100	100		X	X	X	X		X
28	28	Danthonioideae	Chaetobromus + Danthonia + Tribolium + Tenaxia + Rytidosperma	100	100	100	100	100	100	100	100	100	100	100	100	100	100		X	X	X	X		X
29	29	Danthonioideae	Danthonia + Tribolium + Tenaxia + Rytidosperma	100	98.0769	100	66.6667	100	100	100	100	100	100	100	100	100	100			X	X	X
30	30	Danthonioideae	Tribolium + Tenaxia + Rytidosperma	100	100	100	100	100	100	100	100	100	100	100	100	100	100		X	X	X	X		X
31	31	Danthonioideae	Tenaxia + Rytidosperma	96	88	89.8148	89.1026	100	100	100	100	100	90	100	100	100	100				X	X
32	32	Danthonioideae	Rytidosperma [Rytidosperma pallidum + Rytidosperma semiannulare]	88	90	94.4444	92.3077	100	100	100	100	100	91.6667	100	100	100	100				X	X
33	33	Chloridoideae	Chloridoideae [Cynodonteae + Zoysieae + Eragrostideae + Triraphideae + Centropodieae]	100	98.7179	100	100	100	100	100	100	100	100	100	100	100	100			X	X	X
34	34	Chloridoideae	Cynodonteae + Zoysieae + Eragrostideae + Triraphideae	100	100	100	100	100	100	100	100	100	100	100	100	100	100		X	X	X	X		X
35	35	Chloridoideae	Cynodonteae + Zoysieae	100	99	100	97.4359	100	100	100	100	100	100	100	100	100	100			X	X	X
36	36	Chloridoideae	Eragrostideae [Eragrostis + Uniola]	100	100	100	100	100	100	100	100	100	100	100	100	100	100		X	X	X	X		X
37	37	Chloridoideae	Eragrostis	100	100	100	100	100	100	100	100	100	100	100	100	100	100		X	X	X	X		X
38	38	Chloridoideae	Cynodonteae + Zoysieae + Eragrostideae	99	99	100	100	100	100	100	100	100	100	100	100	100	100			X	X	X
39	39	Chloridoideae	Zoysieae [Zoysia + Sporobolus]	100	100	100	100	100	100	100	100	100	100	100	100	100	100		X	X	X	X		X
40	40	Chloridoideae	Sporobolus	100	100	100	100	100	100	100	100	100	100	100	100	100	100		X	X	X	X		X
41	41	Chloridoideae	Sporobolus michauxianus + Sporobolus maritimus	100	100	100	100	100	100	100	100	100	100	100	100	100	100		X	X	X	X		X
42	42	Chloridoideae	Cynodonteae	100	100	100	98.7179	100	100	100	100	100	100	100	100	100	100			X	X	X
43	43	Chloridoideae	Boutelouodinae [Monanthochloinae + Boutelouinae + Hilariinae]	100	100	98	88.4615	100	100	100	100	100	100	100	100	100	100			X	X	X
44	44	Chloridoideae	Hilariinae [Hilaria]	100	100	100	100	100	100	100	100	100	100	100	100	100	100		X	X	X	X		X
45	45	Chloridoideae	Monanthochloinae [Distichlis] + Boutelouinae [Bouteloua]	100	100	98	99.359	100	100	100	100	100	100	100	100	100	100			X	X	X
46	46	Chloridoideae	Boutelouinae [Bouteloua]	100	100	100	100	100	100	100	100	100	100	100	100	100	100			X	X	X
47	47	Chloridoideae	Monanthochloinae [Distichlis]	100	99	100	100	100	100	100	100	100	100	100	100	100	100			X	X	X
48	48	Chloridoideae	Tripogoninae [Halopyrum + Melanocenchris] + Dactylocteniinae [Dactyloctenium] + Trichoneurinae [Trichoneura] + Triodiinae [Triodia] + Eleusininae [Astrebla + Leptochloa + Chloris + Oxychloris + Eustachys]	92	86	83.3333	58.9744	100	100	98.3333	100	100	–	100	100	100	100				X
49	49	Chloridoideae	Boutelouinae [Bouteloua] + Hilariinae [Hilaria] + Monanthochloinae [Distichlis] + Triodiinae [Triodia] + Trichoneurinae [Trichoneura] + Dactylocteniinae [Dactyloctenium] + Eleusininae [Astrebla + Leptochloa + Chloris + Oxychloris + Eustachys]	–	–	–	–	–	–	–	–	–	95	–	–	–	–						X
50	50	Chloridoideae	Tripogoninae [Melanocenchrus + Halopyrum]	100	100	100	97.4359	100	100	100	100	100	100	100	100	100	100			X	X	X
51	51	Chloridoideae	Trichoneurinae [Trichoneura] + Dactylocteniinae [Dactyloctenium] + Triodiinae [Triodia] + Eleusininae [Astrebla + Leptochloa + Chloris + Eustachys + Oxychloris]	–	–	–	–	71.6667	65	80	71.6667	91.6667	96.6667	80	88.3333	96.6667	97	X				X
52	52	Chloridoideae	Triodiinae [Triodia] + Trichoneurinae [Trichoneura] + Dactylocteniinae [Dactyloctenium]	–	–	–	–	–	–	–	–	–	–	–	72	–	50
53	53	Chloridoideae	Trichoneurinae [Trichoneura] + Dactylocteniinae [Dactyloctenium] + Eleusininae [Astrebla + Leptochloa + Chloris + Eustachys + Oxychloris]	–	–	–	–	–	51.6667	–	–	91.6667	55	–	–	76.6667	–
54	54	Chloridoideae	Dactyloctenium + Tripogoninae [Halopyrum + Melanocenchris]	72	51	55.5556	–	–	–	–	–	–	–	–	–	–	–								X
55	55	Chloridoideae	Trichoneurinae [Trichoneura] + Dactylocteniinae [Dactyloctenium]	–	–	–	–	83.3333	76.6667	73.3333	68.3333	100	88.3333	100	93	100	92	X			X	X
56	56	Chloridoideae	Trichoneurinae [Trichoneura] + Eleusininae [Astrebla + Leptochloa + Chloris + Oxychloris + Eustachys]	–	–	59.2593	80.1282	–	–	–	–	–	–	–	–	–	–								X
57	57	Chloridoideae	Trichoneurinae [Trichoneura] + Dactylocteniinae [Dactyloctenium] + Tripogoninae [Halopyrum + Melanocenchris]	65	–	–	–	65	–	–	–	–	–	–	–	–	–						X
58	58	Chloridoideae	Triodiinae [Triodia]	100	100	100	100	100	100	100	100	100	100	100	100	100	100		X	X	X	X		X
59	59	Chloridoideae	Eleusininae [Astrebla + Leptochloa + Chloris + Eustachys + Oxychloris]	100	100	100	100	100	100	100	100	100	100	100	100	100	100		X	X	X	X		X
60	60	Chloridoideae	Leptochloa + Chloris + Eustachys + Oxychloris	100	97	97.2222	100	100	98.3333	90	93.3333	–	–	100	100	–	92				X
61	61	Chloridoideae	Astrebla + Chloris + Eustachys + Oxychloris	–	–	–	–	–	–	–	–	100	–	–	–	–	–				X		X
62	62	Chloridoideae	Astrebla + Leptochloa	–	–	–	–	–	–	–	–	–	–	–	–	51.6667	–						X
63	63	Chloridoideae	Chloris + Eustachys + Oxychloris	100	99	100	100	100	100	100	100	100	100	100	100	100	100			X	X	X
64	64	Chloridoideae	Eustachys + Oxychloris	100	99	100	100	100	100	100	100	100	100	100	100	100	100			X	X	X
65	65	Panicoideae	Panicoideae	100	100	100	100	100	100	100	100	100	100	100	100	100	100		X	X	X	X		X
66	66	Panicoideae	Panicoideae excluding Centotheceae [Centotheca] + Thysanolaeneae [Thysanolaena] + Tristachyideae [Danthoniopsis + Loudetiopsis]	–	–	–	–	–	–	–	–	90	–	100	–	96.6667	–				X
67	67	Panicoideae	Centotheceae [Centotheca] + Thysanolaeneae [Thysanolaena] + Tristachyideae [Danthoniopsis + Loudetiopsis] + Zeugiteae [Zeugites] + Chasmanthieae [Chasmanthium]	66	58	51.8519	–	86.6667	86.6667	70	65	–	–	–	87	–	60
68	68	Panicoideae	Chasmanthieae [Chasmanthium] + Zeugiteae [Zeugites]	69	79	90.7407	87.8205	100	96.6667	100	96.6667	100	56.6667	100	100	100	95				X	X
69	69	Panicoideae	Centotheceae [Centotheca] + Thysanolaeneae [Thysanolaena] + Tristachyideae [Danthoniopsis + Loudetiopsis]	94	86	97.2222	91.0256	100	100	100	100	100	86.6667	100	100	100	100				X	X
70	70	Panicoideae	Centotheceae [Centotheca] + Thysanolaeneae [Thysanolaena]	100	100	100	100	100	100	100	100	100	100	100	100	100	100		X	X	X	X		X
71	71	Panicoideae	Tristachyideae [Danthoniopsis + Loudetiopsis]	100	100	100	100	100	100	100	100	100	100	100	100	100	100		X	X	X	X		X
72	72	Panicoideae	Lecomtelleae [Lecomtella] + Paspaleae + Paniceae	100	100	100	100	100	100	100	100	100	100	100	100	100	100		X	X	X	X		X
73	73	Panicoideae	Lecomtelleae [Lecomtella] + Paspaleae	–	–	–	–	–	–	–	–	–	71.6667	–	–	–	–						X
74	74	Panicoideae	Paniceae + Paspaleae	89	–	–	–	100	100	100	100	100	–	100	100	100	100				X
75	75	Panicoideae	Paniceae	100	100	100	100	100	100	100	100	100	100	100	100	100	100		X	X	X	X		X
76	76	Panicoideae	Paniceae excluding Anthephorinae [Digitaria]	93	85	86.1111	89.7436	86.6667	100	88.3333	100	100	100	100	100	100	100				X	X
77	77	Panicoideae	Boivinellinae [Echinochloa + Amphicarpum + Alloteropsis + Oplismenus]	99	92	98.1481	97.4359	100	100	100	100	100	100	100	100	–	100				X
78	78	Panicoideae	Echinochloa + Amphicarpum + Alloteropsis	84	79	63.8889	50.641	65	70	50	50	–	–	–	65	–	–
79	79	Panicoideae	Echinochloa + Oplismenus + Alloteropsis	–	–	–	–	–	–	–	–	–	–	–	–	96.6667	–						X
80	80	Panicoideae	Oplismenus + Alloteropsis	–	–	–	–	–	–	–	–	–	–	–	–	73.3333	–						X
81	81	Panicoideae	Oplismenus + Amphicarpum + Alloteropsis	–	–	–	–	–	–	–	–	–	66.6667	75	–	–	–
82	82	Panicoideae	Echinochloa [Echinochloa crus-galli + Echinochloa oryzicola]	100	100	100	100	100	100	100	100	100	100	100	100	100	100		X	X	X	X		X
83	83	Panicoideae	Amphicarpum + Alloteropsis	–	71	–	–	95	96.6667	98.3333	100	100	75	100	95	–	100				X
84	84	Panicoideae	Amphicarpum + Neurachninae [Thyridolepis]	–	–	–	–	–	–	–	–	–	–	–	–	96.6667	–						X		X
85	85	Panicoideae	Alloteropsis	100	100	100	100	100	100	100	100	100	100	100	100	100	100		X	X	X	X		X
86	86	Panicoideae	Alloteropsis angusta + Alloteropsis semialata	99	100	100	99.359	100	100	100	100	100	100	100	100	100	100			X	X	X
87	87	Panicoideae	Neurachninae [Thyridolepis] + Dichantheliinae [Dichanthelium] + Panicinae + Melinidinae + Cenchrinae	82	79	70.3704	74.359	93.3333	100	91.6667	100	88.3333	80	100	100	96.6667	100				X	X
88	88	Panicoideae	Neurachninae [Thyridolepis] + Dichantheliinae [Dichanthelium]	58	58	–	–	100	100	98.3333	98.3333	100	98.3333	100	100	–	100				X
89	89	Panicoideae	Panicinae + Melinidinae + Cenchrinae	100	100	100	98.7179	100	100	100	100	100	100	100	100	98.3333	100				X	X
90	90	Panicoideae	Panicinae [Panicum + Whiteochloa]	100	100	100	100	100	100	100	100	100	100	100	100	100	100		X	X	X	X		X
91	91	Panicoideae	Panicum capillare + Whiteochloa	92.5926	60	81.4815	62.1795	100	96.6667	100	100	100	98.3333	100	100	100	100				X	X
92	92	Panicoideae	Cenchrinae + Melinidinae	–	72	–	55.7692	100	100	100	100	100	100	100	100	100	100			X	X	X
93	93	Panicoideae	Panicinae + Melinidinae	54	–	52.7778	–	–	–	–	–	–	–	–	–	–	–								X
94	94	Panicoideae	Melinidinae [Urochloa + Eriochloa + Megathyrsus]	100	100	100	100	100	100	100	100	100	100	100	100	100	100		X	X	X	X		X
95	95	Panicoideae	Urochloa + Eriochloa	100	99	100	100	100	100	100	100	100	100	100	100	100	100			X	X	X
96	96	Panicoideae	Cenchrinae [Cenchrus + Setaria]	100	100	100	100	100	100	100	100	100	100	100	100	100	100		X	X	X	X		X
97	97	Panicoideae	Cenchrus + Setaria italica + Setaria viridis	52	–	61.1111	–	–	–	100	100	100	100	100	100	100	100				X
98	98	Panicoideae	Setaria [Setaria italica + Setaria viridis + Setaria geminata]	–	77	–	59.6154	100	98.3333	–	–	–	–	–	–	–	–				X
99	99	Panicoideae	Setaria italica + Setaria viridis	100	100	100	100	100	100	100	100	100	100	100	100	100	100		X	X	X	X		X
100	100	Panicoideae	Paspaleae + Andropogoneae + Arundinelleae	97	89	66.6667	60.2564	100	100	100	100	100	98	100	100	100	100				X	X
101	101	Panicoideae	Paspaleae [Otachyriinae + Arthropogoninae + Paspalinae]	100	100	100	100	100	100	100	100	100	100	100	100	100	100		X	X	X	X		X
102	102	Panicoideae	Paspalinae [Axonopus + Paspalum]	100	100	100	99.359	100	100	100	100	100	100	100	100	100	100			X	X	X
103	103	Panicoideae	Paspalum [Paspalum gaziovii + Paspalum dilatatum + Paspalum fimbriatum]	100	100	100	100	100	100	100	100	100	100	100	100	100	100		X	X	X	X		X
104	104	Panicoideae	Paspalum dilatatum + Paspalum fimbriatum	92	93	50.9259	53.2051	100	100	100	100	100	100	100	100	100	100			X	X	X
105	105	Panicoideae	Arthopogoninae [Coleataenia + Oncorachis] + Otachyriinae [Plagiantha + Otachyrium + Steinchisma]	–	–	–	–	100	98.3333	100	100	100	98	100	100	100	100	X			X	X
106	106	Panicoideae	Otachyriinae [Plagiantha + Otachyrium + Steinchisma] + Paspalinae [Axonopus + Paspalum]	50	–	74.0741	95	–	–	–	–	–	–	–	–	–	–								X
107	107	Panicoideae	Arthopogoninae [Coleataenia + Oncorachis]	89	86	87.037	94.2308	100	100	100	100	100	98	100	100	100	100				X	X
108	108	Panicoideae	Otachyriinae [Plagiantha + Otachyrium + Steinchisma]	100	100	100	100	100	100	100	100	100	100	100	100	100	100		X	X	X	X		X
109	109	Panicoideae	Otachyrium + Steinchisma	100	100	95.3704	100	100	100	100	100	100	100	100	100	100	100			X	X	X
110	110	Panicoideae	Andropogoneae + Arundinelleae [Arundinella]	100	100	100	100	100	100	100	100	100	100	100	100	100	100		X	X	X	X		X
111	111	Panicoideae	Andropogoneae [Andropogoninae + Saccharinae + Coicinae + Rottboelliinae + Ischaeminae + Tripsacinae + Arthraxoninae]	100	100	100	100	100	100	100	100	100	100	100	100	100	100		X	X	X	X		X
112	112	Panicoideae	Andropogoneae excluding Arthraxoninae [Arthraxon]	79	80	93.5185	87.1795	100	100	100	100	100	100	100	100	100	100			X	X	X
113	113	Panicoideae	Andropogoneae excluding Arthraxoninae [Arthraxon] and Tripsacinae [Zea]	94	83	96.2963	88.4615	100	100	100	100	100	100	100	100	100	100			X	X	X
114	114	Panicoideae	Ischaeminae [Ischaemum] + Coicinae [Coix] + Rottboelliinae [Rottboellia]	100	97	98.1481	98.7179	100	100	100	100	100	100	100	100	100	100			X	X	X
115	115	Panicoideae	Coicinae [Coix] + Rottboelliinae [Rottboellia]	90	99	72.2222	98.7179	100	100	100	100	100	93.3333	100	100	100	100				X	X
116	116	Panicoideae	Andropogoninae + Saccharinae [Eulalia + Sorghastrum + Imperata + Saccharum + Sorghum]	92	83	89.8148	88.4615	100	100	100	100	100	86.6667	100	100	100	100				X	X
117	117	Panicoideae	Sorghum + Saccharum + Imperata	94	95	65.7407	56.4103	100	100	86.6667	96.6667	98.3333	71.6667	100	98	100	100				X	X
118	118	Panicoideae	Sorghum + Saccharum	70	76	–	59.6154	100	100	86.6667	100	100	–	100	100	100	100				X
119	119	Panicoideae	Sorghum [Sorghum timorense + Sorghum bicolor]	83	79	86.1111	–	100	100	100	100	100	100	100	100	100	100			X	X	X
120	120	Panicoideae	Eulalia + Sorghastrum + Andropogoninae [Diheteropogon + Hyparrhenia + Themeda + Iseilema + Capillipedium + Bothriochloa]	–	–	–	–	78.3333	70	–	–	–	56.6667	–	82	–	70	X
121	121	Panicoideae	Sorghastrum + Andropogoninae [Diheteropogon + Hyparrhena + Themeda + Iseilema + Capillipedium + Bothriochloa]	56	60	–	–	–	51.6667	–	–	–	–	–	–	–	–						X
122	122	Panicoideae	Saccharinae [Eulalia + Sorghastrum + Imperata + Saccharum + Sorghum]	–	–	–	–	–	–	93.3333	–	86.6667	–	75	–	81.6667	–
123	123	Panicoideae	Eulalia + Sorghastrum	–	–	56.4815	83.9744	61.6667	–	88.3333	100	95	60	93.3333	62	100	98				X
124	124	Panicoideae	Andropogoninae [Diheteropogon + Hyparrhena + Themeda + Iseilema + Capillipedium + Bothriochloa]	97	98	94.4444	94.2308	100	100	100	100	100	100	100	100	100	100			X	X	X
125	125	Panicoideae	Diheteropogon + Hyparrhena	95	87	95.3704	88.4615	100	100	100	100	100	100	100	100	100	100			X	X	X
126	126	Panicoideae	Themeda + Iseilema + Capillipedium + Bothriochloa	72.2222	70	67.5926	67.3077	100	100	100	100	100	100	100	100	100	100			X	X	X
127	127	Panicoideae	Iseilema + Capillipedium + Bothriochloa	69.4444	56	62.037	55.7692	100	100	100	100	100	100	100	100	100	100			X	X	X
128	128	Panicoideae	Capillipedium + Bothriochloa	100	100	100	100	100	100	100	100	100	100	100	100	100	100		X	X	X	X		X
129	129	Oryzoideae	Oryzoideae	98	99	98.1481	90.3846	100	100	100	100	100	88.3333	100	100	86.6667	100				X	X
130	130	Oryzoideae	Oryzoideae excluding Streptogyneae [Streptogyna]	100	100	100	100	100	100	100	100	100	100	100	100	100	100		X	X	X	X		X
131	131	Oryzoideae	Ehrharteae [Microlaena + Ehrharta]	100	100	100	100	100	100	100	100	100	100	100	100	100	100		X	X	X	X		X
132	132	Oryzoideae	Phyllorachideae + Oryzeae [Zizaniinae + Oryzinae]	100	97	61.1111	94.2308	100	100	100	100	100	100	100	100	100	100			X	X	X
133	133	Oryzoideae	Oryzeae [Zizaniinae + Oryzinae]	100	100	100	100	100	100	100	100	100	100	100	100	100	100		X	X	X	X		X
134	134	Oryzoideae	Zizaniinae [Chikusichloa + Zizania + Rhynchoryza + Potamophila]	100	100	98.1481	100	100	100	100	100	100	100	100	100	100	100			X	X	X
135	135	Oryzoideae	Chikusichloa + Zizania + Rhynchoryza	69	53	–	–	–	–	–	–	100	–	100	–	100	–				X				X
136	136	Oryzoideae	Potamophila + Zizania + Rhynchoryza	–	–	–	51.2821	100	100	100	100	–	51.6667	–	100	–	100				X
137	137	Oryzoideae	Zizania + Rhynchoryza	100	98	100	98.7179	100	100	100	100	100	100	100	100	100	100			X	X	X
138	138	Oryzoideae	Oryzinae [Prosphytochloa + Leersia + Oryza]	100	100	100	100	100	100	100	100	100	100	100	100	100	100		X	X	X	X		X
139	139	Oryzoideae	Prosphytochloa + Leersia	100	100	100	100	100	100	100	100	100	100	100	100	100	100		X	X	X	X		X
140	140	Oryzoideae	Oryza	100	100	100	100	100	100	100	100	100	100	100	100	100	100		X	X	X	X		X
141	141	Oryzoideae	Oryza except Oryza australiensis	99	99	100	98.7179	100	100	100	100	100	96.6667	100	100	100	100				X	X
142	142	Oryzoideae	Oryza except Oryza australiensis and Oryza officinalis	98	90	87.037	74.359	100	100	100	100	100	100	100	100	100	100			X	X	X
143	143	Oryzoideae	Oryza except Oryza australiensis + Oryza officinalis + Oryza punctata	100	100	100	100	100	100	100	100	100	100	100	100	100	100		X	X	X	X		X
144	144	Oryzoideae	Oryza sativa + Oryza nivara + Oryza rufipogon + Oryza barthii + Oryza glaberrima + Oryza longistaminata + Oryza glumpatula	96	83	55.5556	100	100	100	100	100	–	–	–	–	–	–				X
145	145	Oryzoideae	Oryza longistaminata + Oryza glumipatula	–	–	–	–	100	100	100	98.3333	100	100	100	100	100	100	X			X	X
146	146	Oryzoideae	Oryza longistaminata + Oryza glumipatula + Oryza nivara	–	–	68.5185	–	–	–	–	–	–	–	–	–	–	–								X
147	147	Oryzoideae	Oryza sativa + Oryza nivara + Oryza rufipogon + Oryza barthii + Oryza glaberrima + Oryza meridionalis	–	–	–	–	98.3333	85	98	70	100	100	100	100	100	100	X			X	X
148	148	Oryzoideae	Oryza sativa + Oryza nivara + Oryza rufipogon + Oryza barthii + Oryza glaberrima	67	62.8205	–	–	85	81.6667	–	–	100	98.3333	100	100	100	97				X
149	149	Oryzoideae	Oryza sativa + Oryza nivara + Oryza rufipogon + Oryza meridionalis	–	–	–	–	–	–	63.3333	–	–	–	–	–	–	–						X
150	150	Oryzoideae	Oryza barthii + Oryza glaberrima	100	96	91.6667	84.6154	100	100	100	100	100	96.6667	100	100	100	60				X	X
151	151	Oryzoideae	Oryza sativa + Oryza nivara + Oryza rufipogon	–	–	–	–	83	73.3333	56.6667	65	100	98.3333	100	100	100	95	X			X	X
152	152	Oryzoideae	Oryza nivara + Oryza longistaminata	–	–	54.6296	–	–	–	–	–	–	–	–	–	–	–								X
153	153	Oryzoideae	Oryza sativa + Oryza nivara	–	68	–	–	–	–	95	–	100	100	100	100	100	100				X
154	154	Oryzoideae	Oryza nivara + Oryza rufipogon	–	–	–	–	–	–	–	53.3333	–	–	–	–	–	–						X
155	155	Oryzoideae	Oryza sativa + Oryza rufipogon	–	–	–	–	58.3333	86.6667	–	–	–	–	–	–	–	–	X
156	156	Bambusoideae	Bambusoideae	100	100	100	100	100	100	100	100	100	100	100	100	100	100		X	X	X	X		X
157	157	Bambusoideae	Bambuseae + Olyreae	97	89.7436	98.1481	92.3077	100	100	100	100	100	100	100	100	100	100			X	X	X
158	158	Bambusoideae	Olyreae	100	100	100	100	100	100	100	100	100	100	100	100	100	100		X	X	X	X		X
159	159	Bambusoideae	Olyreae except Burgersiochloa	99	99.359	99.0741	97.4359	100	100	100	100	100	100	100	100	100	100			X	X	X
160	160	Bambusoideae	Parianinae [Eremitis + Pariana]	100	100	100	100	100	100	100	100	100	100	100	100	100	100		X	X	X	X		X
161	161	Bambusoideae	Pariana [Pariana sp. + Pariana campestris + Pariana radiciflora]	91	99	71.2963	98.0769	100	100	100	100	100	100	100	100	100	100			X	X	X
162	162	Bambusoideae	Pariana sp. + Pariana campestris	91	96	70.3704	94.2308	100	100	100	100	100	100	100	100	100	100			X	X	X
163	163	Bambusoideae	Olyrinae [Diandrolyra + Raddia + Olyra + Cryptochloa + Lithachne]	100	100	100	99.359	100	100	100	100	100	100	100	100	100	100			X	X	X
164	164	Bambusoideae	Raddia + Olyra + Cryptochloa + Lithachne	100	100	100	100	100	100	100	100	100	100	100	100	100	100		X	X	X	X		X
165	165	Bambusoideae	Olyra + Cryptochloa + Lithachne	94	89	66.6667	100	100	100	100	100	100	100	100	100	100	100			X	X	X
166	166	Bambusoideae	Cryptochloa + Lithachne	94	90	72.2222	100	100	100	100	100	100	86.6667	100	100	100	100				X	X
167	167	Bambusoideae	Bambuseae	99	96	99.0741	98.7179	100	100	100	100	100	100	100	100	100	100			X	X	X
168	168	Bambusoideae	Bambusinae + Greslaninae + Dinochloinae + Hickeliinae [=paleotropical woody clade]	100	99	99	99.359	100	100	100	100	100	100	100	100	100	100			X	X	X
169	169	Bambusoideae	Greslaninae [Greslania] + Dinochloinae [Neololeba] + Hickeliinae [Hickelia]	–	–	–	–	100	96.6667	100	100	91.6667	–	91.6667	–	100	–	X			X
170	170	Bambusoideae	Bambusinae [Bambusa + Dendrocalamus] + Greslaninae [Greslania] + Dinochloinae [Neololeba]	70	–	94.4444	85.8974	–	–	–	–	–	100	–	100	–	100				X				X
171	171	Bambusoideae	Greslaninae [Greslania] + Dinochloinae [Neololeba]	99	96	100	100	100	98.3333	100	100	100	100	100	100	100	100				X	X
172	172	Bambusoideae	Bambusinae [Bambusa + Dendrocalamus]	98	99	100	99.359	100	100	100	100	100	100	100	100	100	100			X	X	X
173	173	Bambusoideae	Bambusa	–	–	54.6296	–	50	–	–	–	93.3333	93.3333	91.6667	87	61.6667	85
174	174	Bambusoideae	Bambusa multiplex + Bambusa oldhamii + Bambusa emeiensis + Bambusa bambos + Dendrocalamus	94	97	–	–	–	–	–	–	–	–	–	–	–	–								X
175	175	Bambusoideae	Bambusa multiplex + Bambusa oldhamii + Bambusa emeiensis + Bambusa arnhemica + Dendrocalamus	–	–	–	–	–	–	–	51.6667	–	–	–	–	–	–						X
176	176	Bambusoideae	Bambusa multiplex + Bambusa oldhamii + Bambusa emeiensis + Bambusa bambos	–	51	58.3333	57.6923	–	–	–	–	–	97	91.6667	83	–	83.3333								X
177	177	Bambusoideae	Bambusa multiplex + Bambusa oldhamii + Bambusa emeiensis + Bambusa arnhemica	–	–	–	–	68.3333	–	–	50	83.9286	–	–	–	63.3333	–	X
178	178	Bambusoideae	Bambusa multiplex + Bambusa oldhamii + Bambusa emeiensis + Dendrocalamus	–	–	–	–	–	–	75	–	–	–	–	–	–	–						X
179	179	Bambusoideae	Bambusa multiplex + Bambusa oldhamii + Bambusa emeiensis	83	74	79.6296	83.9744	100	100	100	100	100	100	100	100	100	100			X	X	X
180	180	Bambusoideae	Bambusa multiplex + Bambusa oldhamii	100	100	100	99.359	98.3333	98.3333	100	96.6667	100	100	100	100	100	100				X	X
181	181	Bambusoideae	Chusqueinae + Arthrostylidiinae + Guaduinae [=neotropical woody clade]	94.4444	76	94.4444	87.8205	100	98.3333	100	88.3333	100	93.3333	100	100	100	100				X	X
182	182	Bambusoideae	Chusquea [Chusquea spectabilis + Chusquea liebmannii + Chusquea circinata + Chusquea sp.]	97	77	96.2963	79.4872	100	100	100	100	100	100	100	100	100	100			X	X	X
183	183	Bambusoideae	Chusquea liebmannii + Chusquea circinata + Chusquea sp.	100	100	100	100	100	100	100	100	100	100	100	100	100	100		X	X	X	X		X
184	184	Bambusoideae	Chusquea liebmannii + Chusquea circinata	100	100	100	100	100	100	100	100	100	100	100	100	100	100		X	X	X	X		X
185	185	Bambusoideae	Arthrostylidiinae [Rhipidocladum] + Guaduinae [Guadua + Olmeca + Otatea]	100	100	100	100	100	100	100	100	100	100	100	100	100	100		X	X	X	X		X
186	186	Bambusoideae	Guaduinae [Guadua + Olmeca + Otatea]	100	100	100	100	100	100	100	100	100	100	100	100	100	100		X	X	X	X		X
187	187	Bambusoideae	Olmeca + Otatea	100	100	100	98.7179	100	100	100	100	96.6667	–	100	100	100	100				X
188	188	Bambusoideae	Olmeca + Guadua	–	–	–	–	–	–	–	–	–	86.6667	–	–	–	–						X
189	189	Bambusoideae	Otatea [Otatea glauca + Otatea acuminata]	100	100	100	98.7179	100	100	100	100	100	100	100	100	100	100			X	X	X
190	190	Bambusoideae	Arundinarieae	100	100	100	100	100	100	100	100	100	100	100	100	100	100		X	X	X	X		X
191	191	Bambusoideae	Arundinarieae clades III, IV, V, VI, VII, VIII, IX [temperate woody excluding clade XI, Ampelocalamus calcareus]	83	79	61.1111	58.9744	85	100	95	98.3333	100	98.3333	100	100	100	100				X	X
192	192	Bambusoideae	Arundinarieae clades VIII [Indocalamus wilsonii] + IV [Ferrocalamus + Gelidocalamus + Shibataea] + VI [Sasa + Arundinaria + Pseudosasa + Pleioblastus + Acidosasa + Indosasa + Oligostachyum]	–	–	–	–	–	–	–	–	66.6667	–	93	–	81.6667	–
193	193	Bambusoideae	Arundinarieae clades VIII [Indocalamus wilsonii] + VII [Thamnocalamus] + IX [Gaoligongshania] + III [Chimonocalamus] + V [Sarocalamus + Yushania + Drepanostachyum + Indocalamus longiauritus + Fargesia + Bashania + Phyllostachys ]	–	–	–	–	–	–	56.6667	–	–	–	–	–	–	–						X
194	194	Bambusoideae	Arundinarieae clades VIII [Indocalamus wilsonii] + IV [Ferrocalamus + Gelidocalamus + Shibataea]	–	–	–	–	–	–	–	–	–	–	93.3333	–	75	–
195	195	Bambusoideae	Arundinarieae clades IV [Ferrocalamus + Gelidocalamus + Shibataea] + VI [Sasa + Arundinaria + Pseudosasa + Pleioblastus + Acidosasa + Indosasa + Oligostachyum]	–	–	–	–	–	–	65	50	96.6667	–	–	–	–	–
196	196	Bambusoideae	Arundinarieae clade IV [Ferrocalamus + Gelidocalamus + Shibataea]	97	95	93.5185	73.0769	100	100	100	100	100	80	100	100	100	100				X	X
197	197	Bambusoideae	Gelidocalamus + Shibataea	75	–	62.037	64.1026	65	51.6667	90	81.6667	96.6667	81.6667	100	72	100	97				X	X
198	198	Bambusoideae	Arundinarieae clade VI [Sasa + Arundinaria + Pseudosasa + Pleioblastus + Acidosasa + Indosasa + Oligostachyum]	–	–	–	–	98.3333	95	96.6667	96.6667	100	100	100	100	100	100	X			X	X
199	199	Bambusoideae	Arundinarieae clade VI Japan-North American subclade [Sasa + Arundinaria]	–	–	–	–	71.6667	63.3333	68.3333	75	88.3333	–	98.3333	90	81.6667	82	X
200	200	Bambusoideae	Arundinarieae clade VI excluding Sasa [Arundinaria + Pseudosasa + Pleioblastus + Acidosasa + Indosasa + Oligostachyum]	–	–	–	–	–	–	–	–	–	68.3333	–	–	–	–						X
201	201	Bambusoideae	Arundinaria [Arundinaria tecta + Arundinaria appalachiana + Arundinaria gigantea]	56	–	56.4815	50	100	93.3333	100	91.6667	100	73.3333	100	93	100	90				X	X
202	202	Bambusoideae	Arundinaria tecta + Arundinaria appalachiana	100	100	100	100	100	100	100	100	100	100	100	100	100	100		X	X	X	X		X
203	203	Bambusoideae	Arundinarieae clade VI Sino-Japanese subclade [Pseudosasa + Pleioblastus + Acidosasa + Indosasa + Oligostachyum]	56	–	95.3704	–	98.3333	100	100	100	98.3333	100	100	100	100	100				X	X
204	204	Bambusoideae	Arundinarieae clade VI Sino-Japanese subclade excluding Pseudosasa [Pleioblastus + Acidosasa + Indosasa + Oligostachyum]	100	100	92.5926	62.0915	100	100	100	100	100	93.3333	100	100	100	100				X	X
205	205	Bambusoideae	Arundinarieae clade VI Sino-Japanese subclade excluding Pseudosasa and Pleioblastus [Acidosasa + Indosasa + Oligostachyum]	–	56	–	–	–	–	–	–	–	93.3333	83.3333	53	–	–								X
206	206	Bambusoideae	Arundinarieae clade VI Sino-Japanese subclade excluding Pseudosasa and Acidosasa [Pleioblastus + Indosasa + Oligostachyum]	–	–	–	–	93.3333	88.3333	72	95	66.6667	–	–	–	70	91.6667	X
207	207	Bambusoideae	Indosasa + Oligostachyum	–	–	–	–	–	–	–	–	86.6667	–	73.3333	70	93.3333	93
208	208	Bambusoideae	Indosasa + Pleioblastus	–	62	–	–	70	73.3333	–	78.3333	–	–	–	–	–	–
209	209	Bambusoideae	Oligostachyum + Pleioblastus	–	–	–	–	–	–	53.3333	–	–	–	–	–	–	–						X
210	210	Bambusoideae	Arundinarieae clades VII [Thamnocalamus] + III [Chimonocalamus] + IX [Gaoligongshania] + V [Sarocalamus + Yushania + Drepanostachyum + Indocalamus longiauritus + Fargesia + Bashania + Phyllostachys ]	–	–	–	–	–	–	–	50	–	–	91.6667	77	81.6667	53
211	211	Bambusoideae	Arundinarieae clades III [Chimonocalamus] + VII [Thamnocalamus]	–	–	–	–	–	–	–	–	53.3333	–	–	–	–	–						X
212	212	Bambusoideae	Arundinarieae clades III [Chimonocalamus] + IX [Gaoligongshania] + V [Sarocalamus + Yushania + Drepanostachyum + Indocalamus longiauritus + Fargesia + Bashania + Phyllostachys ]	–	–	–	–	85	68.3333	65	85	66.6667	–	55	73	75	77	X
213	213	Bambusoideae	Arundinarieae clades IX [Gaoligongshania] + III [Chimonocalamus]	–	–	69.4444	69.2308	85	80	75	93.3333	–	–	60	82	76.6667	80
214	214	Bambusoideae	Arundinarieae temperate woody excluding Ampelocalamus and clade IX [Gaoligongshania]	–	52	–	–	–	–	–	–	–	–	–	–	–	–								X
215	215	Bambusoideae	Arundinarieae clade V [Sarocalamus + Yushania + Drepanostachyum + Indocalamus longiauritus + Fargesia + Bashania + Phyllostachys ]	99	97	98.1481	98.0769	100	100	100	100	100	96.6667	100	100	100	100				X	X
216	216	Bambusoideae	Drepanostachyum + Indocalamus longiauritus + Yushania + Bashania + Fargesia + Phyllostachys	–	–	59.2593	–	76.6667	70	73.3333	66.6667	95	–	85	63	95	77
217	217	Bambusoideae	Indocalamus longiauritus + Yushania	92	88	–	–	63.3333	85	–	–	91.6667	–	96.6667	92	93.3333	73
218	218	Bambusoideae	Drepanostachyum + Indocalamus longiauritus	–	–	–	–	–	–	53.3333	–	–	–	–	–	–	–						X
219	219	Bambusoideae	Yushania [Yushania levigata + Yushania yunnanensis]	76	69	61.1111	69.2308	85	96.6667	63.3333	90	85	–	96.6667	95	96.6667	87
220	220	Bambusoideae	Bashania fargesii + Fargesia + Phyllostachys	–	–	–	–	83.3333	95	98.3333	98.3333	93.3333	51.6667	100	100	100	98	X			X	X
221	221	Bambusoideae	Bashania fargesii + Fargesia	–	–	–	–	–	–	58.3333	–	53.3333	–	63.3333	–	–	–
222	222	Bambusoideae	Fargesia + Phyllostachys	–	–	–	–	–	–	–	–	–	–	–	68	58.3333	–
223	223	Bambusoideae	Fargesia + Phyllostachys nigra+ Phyllostachys sulphurea	–	–	52	–	–	–	–	–	–	–	–	–	–	–								X
224	224	Bambusoideae	Fargesia [Fargesia nitida + Fargesia spathacea]	–	–	–	–	91.6667	73.3333	68.3333	73.3333	80	–	100	75	85	55	X			X
225	225	Bambusoideae	Phyllostachys	–	–	–	–	96.6667	93.3333	100	90	81.6667	65	95	97	100	97	X			X	X
226	226	Bambusoideae	Phyllostachys sulphurea + Phyllostachys nigra + Phyllostachys aurea + Phyllostachys propinqua	–	–	–	–	68.3333	–	–	–	–	–	–	60	–	58	X
227	227	Bambusoideae	Phyllostachys aurea + Phyllostachys propinqua + Phyllostachys edulis	–	–	–	–	–	–	–	–	81.6667	–	95	–	100	–				X
228	228	Bambusoideae	Phyllostachys aurea + Phyllostachys propinqua	–	–	–	–	88.3333	78.3333	91.6667	83.3333	100	68.3333	100	92	100	88	X			X	X
229	229	Bambusoideae	Phyllostachys sulphurea + Phyllostachys nigra	94	94	95.3704	77.5641	100	100	93.3333	96.6667	100	86.6667	100	100	100	100				X	X
230	230	Pooideae	Pooideae	100	100	100	100	100	100	100	100	100	100	100	100	100	100		X	X	X	X		X
231	231	Pooideae	Pooideae excluding Brachyelytreae [Brachyelytrum]	100	100	100	99.359	100	100	100	100	100	100	100	100	100	100			X	X	X
232	232	Pooideae	Lygeae [Lygeum] + Nardeae [Nardus]	100	100	100	100	100	100	100	100	100	100	100	100	100	100		X	X	X	X		X
233	233	Pooideae	Pooideae excluding Brachyelytreae [Brachyelytrum] + Lygeae [Lygeum] + Nardeae [Nardus]	100	100	100	100	100	100	100	100	100	100	100	100	100	100		X	X	X	X		X
234	234	Pooideae	Meliceae [Melica] + Stipeae + Diarrheneae [Diarrhena] + Brachypodieae [Brachypodium] + Bromeae [Bromus] + Triticeae + Poeae	62	64	–	–	100	100	100	100	100	88.3333	100	100	100	100				X	X
235	235	Pooideae	Meliceae [Melica] + Diarrheneae [Diarrhena] + Brachypodieae [Brachypodium] + Bromeae [Bromus] + Triticeae + Poe	54	59	–	–	–	–	–	–	–	–	–	–	–	–								X
236	236	Pooideae	Melica [Melica mutica + Melica subulata]	100	100	100	100	100	100	100	100	100	100	100	100	100	100		X	X	X	X		X
237	237	Pooideae	Stipeae + Diarrheneae [Diarrhena] + Brachypodieae [Brachypodium] + Bromeae [Bromus] + Triticeae + Poeae	–	–	–	–	100	100	100	100	100	88.3333	98.3333	100	100	100				X	X
238	238	Pooideae	Stipeae + Ampelodesmeae [Ampelodesmos]	100	100	100	100	100	100	100	100	100	100	100	100	100	100		X	X	X	X		X
239	239	Pooideae	Piptochaetium + Ampelodesmeae [Ampelodesmos] + Oryzopsis	–	53	–	–	100	100	100	100	100	88.3333	100	100	100	100				X	X
240	240	Pooideae	Oryzopsis + Ampelodesmeae [Ampelodesmos]	76	74	70.3704	62.1795	100	100	98.3333	100	100	95	100	100	100	100				X	X
241	241	Pooideae	Piptatherum + Nassella + Achnatherum	92	81	83.3333	76.9231	100	100	100	100	100	100	100	100	100	100			X	X	X
242	242	Pooideae	Nassella + Achnatherum	100	100	100	100	100	100	100	100	100	100	100	100	100	100		X	X	X	X		X
243	243	Pooideae	Diarrheneae [Diarrhena] + Brachypodieae [Brachypodium] + core Pooideae	100	100	100	100	100	100	100	100	100	100	100	100	100	100		X	X	X	X		X
244	244	Pooideae	Diarrheneae [Diarrhena] + Bromeae [Bromus] + Triticeae + Poeae	–	–	–	78	–	–	–	–	–	–	–	–	–	–								X
245	245	Pooideae	Diarrheneae [Diarrhena] + Brachypodieae [Brachypodium]	–	–	–	–	–	–	–	–	–	–	–	55	–	72
246	246	Pooideae	Brachypodieae [Brachypodium] + Bromeae [Bromus] + Triticeae + Poeae	99	90	81.4815	–	80	61.6667	85	55	100	–	100	–	100	–				X
247	247	Pooideae	Bromeae [Bromus] + Triticeae + Poeae	100	100	100	100	100	100	100	100	100	100	100	100	100	100		X	X	X	X		X
248	248	Pooideae	Bromeae [Bromus] + Triticeae	100	100	100	100	100	100	100	100	100	100	100	100	100	100		X	X	X	X		X
249	249	Pooideae	Triticeae [Hordeum + Connorochloa + Secale + Taeinatherum + Triticum + Aegilops]	100	99.359	100	100	100	100	100	100	100	100	100	100	100	100			X	X	X
250	250	Pooideae	Hordeum [Hordeum vulgare + Hordeum jubatum]	100	100	100	100	100	100	100	100	100	100	100	100	100	100		X	X	X	X		X
251	251	Pooideae	Connorochloa + Secale + Taeinatherum + Triticum + Aegilops	100	100	99.0741	96.1538	100	100	100	100	100	100	100	100	100	100			X	X	X
252	252	Pooideae	Secale + Taeinatherum + Triticum + Aegilops	100	96	99	95.5128	–	100	100	100	100	100	100	100	100	100				X
253	253	Pooideae	Secale + Triticum + Aegilops	–	–	–	–	52	–	–	–	–	–	–	–	–	–	X					X
254	254	Pooideae	Tainiatherum + Triticum + Aegilops	75	53	93.5185	65.3846	–	100	100	100	100	95	100	100	100	100				X
255	255	Pooideae	Taeniantherum + Aegilops speltoides and most Triticum	–	–	–	–	–	–	–	–	–	–	58.3333	–	61.6667	–
256	256	Pooideae	Aegilops + Triticum	69	53	77.7778	–	73.3333	81.6667	76.6667	60	60	90	100	73.3333	100	60				X	X
257	257	Pooideae	Triticum macha + Triticum turgidum + Triticum aestivum + Aegilops speltoides + Triticum timopheevii	100	100	97.2222	100	100	100	100	100	100	100	100	100	100	100			X	X	X
258	258	Pooideae	Aegilops speltoides + Triticum timopheevii	99	99	98.1481	95.5128	100	100	100	100	100	100	100	100	100	100			X	X	X
259	259	Pooideae	Triticum macha + Triticum turgidum + Triticum aestivum	100	99	97.1963	98.7179	100	100	100	100	100	100	100	100	100	100			X	X	X
260	260	Pooideae	Triticum macha + Triticum turgidum	89	–	99	–	–	80	–	95	–	90	–	100	–	100				X
261	261	Pooideae	Triticum turgidum + Triticum aestivum	–	–	–	–	81.6667	–	75	–	–	–	90	–	–	–	X
262	262	Pooideae	Triticum macha + Triticum aestivum	–	–	–	–	–	–	–	–	53.3333	–	–	–	88.3333	–
263	263	Pooideae	Aegilops bicornis + Aegilops sharonensis + Aegilops longissima + Aegilops kotschyi + Aegilops searsii + Aegilops geniculata + Aegilops cylindrica + Aegilops tauschii + Triticum urartu + Triticum monococcum	100	100	100	100	100	100	100	100	100	100	100	100	100	100		X	X	X	X		X
264	264	Pooideae	Triticum urartu + Triticum monococcum	100	100	99	100	100	100	100	100	100	100	100	100	100	100			X	X	X
265	265	Pooideae	Aegilops bicornis + Aegilops sharonensis + Aegilops longissima + Aegilops kotschyi + Aegilops searsii + Aegilops geniculata + Aegilops cylindrica + Aegilops tauschii	76	57	55.5556	68.5897	100	100	100	100	100	98.3333	100	100	100	100				X	X
266	266	Pooideae	Aegilops cylindra + Aegilops tauschii	100	100	100	100	100	100	100	100	100	100	100	100	100	100		X	X	X	X		X
267	267	Pooideae	Aegilops bicornis + Aegilops sharonensis + Aegilops longissima + Aegilops kotschyi + Aegilops searsii + Aegilops geniculata	–	–	–	–	98.3333	100	98.3333	98.3333	100	–	100	100	100	96.6667	X			X
268	268	Pooideae	Aegilops bicornis + Aegilops sharonensis + Aegilops longissima + Aegilops kotschyi + Aegilops searsii + Aegilops cylindrica + Aegilops tauschii	–	–	–	–	–	–	–	–	–	50	–	–	–	–						X
269	269	Pooideae	Aegilops geniculata + Aegilops cylindrica + Aegilops tauschii	56	–	–	53.2051	–	–	–	–	–	–	–	–	–	–								X
270	270	Pooideae	Aegilops bicornis + Aegilops sharonensis + Aegilops longissima + Aegilops kotschyi + Aegilops searsii	91	93	87.037	86.5385	100	100	100	100	100	100	–	100	100	100				X
271	271	Pooideae	Aegilops searsii + Aegilops bicornis	–	–	–	–	–	–	–	–	–	–	55	–	56.6667	–
272	272	Pooideae	Aegilops searsii + Aegilops kotschyi + Aegilops longissima + Aegilops sharonensis	–	–	–	–	–	–	–	55	–	–	–	–	–	–						X
273	273	Pooideae	Aegilops longissima + Aegilops sharonensis	74	64	67.5926	68.5897	–	61.6667	58.3333	–	–	–	–	51.6667	–	66.6667
274	274	Pooideae	Aegilops kotschyi + Aegilops longissima + Aegilops sharonensis	–	–	–	–	53.3333	–	–	–	–	–	–	–	50	–	X
275	275	Pooideae	Aegilops searsii + Aegilops kotschyi	–	–	–	–	–	–	–	–	–	–	–	53	–	–						X
276	276	Pooideae	Aegilops kotschyi + Aegilops sharonensis	–	–	–	–	–	–	–	–	90	–	78.3333	–	88.3333	–
277	277	Pooideae	Aegilops kotschyi + Aegilops bicornis + Aegilops longissima + Aegilops sharonensis	–	–	50.9259	–	–	–	–	–	–	–	–	–	–	–								X
278	278	Pooideae	Poeae	100	100	100	100	100	100	100	100	100	100	100	100	100	100		X	X	X	X		X
279	279	Pooideae	Poeae chloroplast group 1 [Phalaridinae + Torreyochloinae + Agrostidinae + Brizinae + Anthoxanthinae + Aveninae]	100	100	100	100	100	100	100	100	100	100	100	100	100	100		X	X	X	X		X
280	280	Pooideae	Phalaridinae [Phalaris] + Torreyochloinae [Torreyochloa]	–	54	81.4815	83.3333	100	100	100	100	100	100	100	100	100	100			X	X	X
281	281	Pooideae	Agrostidinae + Brizinae + Anthoxanthinae + Aveninae	64	80	89.8148	91.0256	–	–	–	–	100	98	–	50	–	98				X				X
282	282	Pooideae	Aveninae [Avena + Trisetum]	100	100	100	100	100	100	100	100	100	100	100	100	100	100		X	X	X	X		X
283	283	Pooideae	Agrostidinae + Brizinae [Briza] + Anthoxanthinae [Anthoxanthum]	81	61	87.037	59.6154	100	100	100	100	100	100	100	100	100	100			X	X	X
284	284	Pooideae	Anthoxanthinae [Anthoxanthum]	100	99	100	99.359	100	100	100	100	100	100	100	100	100	100			X	X	X
285	285	Pooideae	Brizinae [Briza] + Agrostidinae [Gastridium + Agrostis + Calamagrostis]	90	–	99.0741	–	100	100	100	100	100	80	100	100	100	100				X	X
286	286	Pooideae	Agrostidinae [Gastridium + Agrostis + Calamagrostis]	100	100	100	100	100	100	100	100	100	100	100	100	100	100		X	X	X	X		X
287	287	Pooideae	Gastridium + Agrostis	67	65	85.1852	56.4103	100	100	100	100	100	96.6667	100	100	100	100				X	X
288	288	Pooideae	Agrostis [Agrostis gigantea + Agrostis stolonifera]	100	95	100	96.1538	100	100	100	100	100	100	100	100	100	100			X	X	X
289	289	Pooideae	Poeae chloroplast group 2 [Coleanthinae + Phleinae + Poinae + Alopecurinae + Airinae + Holcinae + Aristaveninae + Dactylidinae + Parapholiinae + Cynosurinae + Loliinae]	100	100	100	100	100	100	100	100	100	100	100	100	100	100		X	X	X	X		X
290	290	Pooideae	Poinae [Poa]	100	97	96.2963	94.2308	100	100	100	100	100	100	100	100	100	100			X	X	X
291	291	Pooideae	Coleanthinae [Zingeria + Puccinellia]	100	100	100	100	100	100	100	100	100	100	100	100	100	100		X	X	X	X		X
292	292	Pooideae	Poinae [Poa] + Phleinae [Phleum] + Alopecurinae [Alopecurus] [=Poodinae]	100	100	100	100	100	100	100	100	100	100	100	100	100	100		X	X	X	X		X
293	293	Pooideae	Phleinae [Phleum] + Alopecurinae [Alopecurus]	–	–	–	–	–	–	–	–	100	65	100	–	–	–				X
294	294	Pooideae	Poinae [Poa] + Alopecurinae [Alopecurus]	–	58	64.8148	84.6154	100	100	100	100	–	–	–	100	100	93.3333				X
295	295	Pooideae	Phleinae [Phleum] + Poinae [Poa]	62	–	–	–	–	–	–	–	–	–	–	–	–	–								X
296	296	Pooideae	Airinae + Holcinae + Aristaveninae + Dactylidinae + Parapholiinae + Cynosurinae + Loliinae	97	56	96.2963	97.4359	100	100	100	100	100	100	100	100	100	100			X	X	X
297	297	Pooideae	Airinae [Helictochloa] + Holcinae [Holcus]	–	–	59.2593	50.641	55	–	51.6667	–	50	–	100	92	100	65				X
298	298	Pooideae	Airinae [Helictochloa] + Aristaveninae [Deschampsia] + Dactylidinae [Dactylis + Lamarckia] + Loliinae [Lolium + Drymochloa + Festuca]	–	–	–	–	–	70	–	53.3333	–	–	–	–	–	–
299	299	Pooideae	Aristaveninae [Deschampsia] + Dactylidinae + Cynosurinae [Cynosurus] + Parapholiinae [Catapodium] + Loliinae	–	–	–	–	76.6667	86.6667	90	86.6667	90	–	100	97	100	95	X			X
300	300	Pooideae	Loliinae [Lolium + Drymochloa + Festuca] + Dactylidinae [Dactylis + Lamarckia] + Cynosurinae [Cynosurus] + Parapholiinae [Catapodium]	–	–	–	–	91.6667	96.6667	96.6667	93.3333	98.3333	–	100	98	100	95	X			X
301	301	Pooideae	Dactylidinae [Dactylis + Lamarckia] + Parapholiinae [Catapodium] + Cynosurinae [Cynosurus]	81.4815	78	60.1852	51.9231	100	100	100	100	100	83.3333	100	100	100	100				X	X
302	302	Pooideae	Parapholiinae [Catapodium] + Cynosurinae [Cynosurus]	100	100	100	100	100	100	100	100	100	100	100	100	100	100		X	X	X	X		X
303	303	Pooideae	Dactylidinae [Lamarckia + Dactylis]	100	100	100	100	100	100	100	100	100	100	100	100	100	100		X	X	X	X		X
304	304	Pooideae	Loliinae [Lolium + Drymochloa + Festuca]	100	100	100	100	100	100	100	100	100	100	100	100	100	100		X	X	X	X		X
305	305	Pooideae	Lolium + Drymochloa	100	100	100	100	100	100	100	100	100	100	100	100	100	100		X	X	X	X		X
306	306	Pooideae	Lolium [Lolium perenne + Lolium multiflorum + Lolium pratense + Lolium arundinaceum]	100	100	100	100	100	100	100	100	100	100	100	100	100	100		X	X	X	X		X
307	307	Pooideae	Lolium perenne + Lolium multiflorum + Lolium pratense	100	100	100	100	100	100	100	100	100	100	100	100	100	100		X	X	X	X		X
308	308	Pooideae	Lolium perenne + Lolium multiflorum	94.4444	94	100	98.7179	100	100	100	100	100	100	100	100	100	100			X	X	X
309	309	Pooideae	Phalaridinae + Torreyochloinae + Agrostidinae + Brizinae + Anthoxanthinae	–	–	–	–	98	80	80	78	–	–	98	–	100	–	X			X
